1  
2  
3  
4  
5  
6  
7  
8  
9  
10  
11  
12  
13  
14  
15  
16  
17  
18  
19  
20  
21  
22  
23  
24  
25  
26  
27  
28  
29  
30  
31  
32  
33  
34  
35  
36  
37  
38  
39  
40  
41

*Drosophila* insulin-like peptide 1 (DILP1) promotes  
organismal growth and catabolic energy metabolism  
during the non-feeding pupal stage

Sifang Liao<sup>1</sup>, Stephanie Post<sup>2</sup>, Philipp Lehmann<sup>1</sup>, Jan A. Veenstra<sup>3</sup>, Marc  
Tatar<sup>2</sup> and Dick R. Nässel<sup>1\*</sup>

<sup>1</sup>Department of Zoology, Stockholm University, S-10691 Stockholm, Sweden

<sup>2</sup>Department of Ecology and Evolutionary Biology, Brown University,  
Providence, RI 02912, USA

<sup>3</sup>Institut de Neurosciences Cognitives et Intégratives d'Aquitaine (CNRS  
UMR5287), University of Bordeaux, Pessac, France

\* Corresponding author  
[dnassel@zoologi.su.se](mailto:dnassel@zoologi.su.se)

|                                       |                                                                                            |
|---------------------------------------|--------------------------------------------------------------------------------------------|
| ORCID for D.R.N.: 0000-0002-1147-7766 | <a href="mailto:dnassel@zoologi.su.se">dnassel@zoologi.su.se</a>                           |
| ORCID for S.L.: 0000-0003-2828-6891   | <a href="mailto:sifang.liao@zoologi.su.se">sifang.liao@zoologi.su.se</a>                   |
| ORCID for S.P.: 0000-0003-2354-736X   | <a href="mailto:stephanieepost@gmail.com">stephanieepost@gmail.com</a>                     |
| ORCID for P.L.: 0000-0001-8344-6830   | <a href="mailto:philipp.lehmann@zoologi.su.se">philipp.lehmann@zoologi.su.se</a>           |
| ORCID for J.A.V.: 0000-0002-2783-0018 | <a href="mailto:jan-adrianus.veenstra@ubordeaux.fr">jan-adrianus.veenstra@ubordeaux.fr</a> |
| ORCID for M.T.: 0000 0003 3232 6884   | <a href="mailto:marc_tatar@brown.edu">marc_tatar@brown.edu</a>                             |

**Key words:** Insulin signaling, development, metabolism, respirometry, stress responses, adult tissue growth, neuronal growth

42

## Abstract

43 The insulin/IGF-signaling pathway is central in control of nutrient-dependent  
44 growth during development, and in adult physiology and longevity. Eight  
45 insulin-like peptides (DILP1-8) have been identified in *Drosophila* and several  
46 of these are known to regulate growth, metabolism, reproduction, stress  
47 responses and lifespan. However, the functional role of DILP1 is far from  
48 understood. Previous work has shown that *dilp1*/DILP1 is transiently  
49 expressed mainly during the non-feeding pupal stage and the first days of  
50 adult life. Here we show that mutation of *dilp1* diminishes organismal weight  
51 during pupal development, whereas overexpression increases it, similar to  
52 *dilp6* manipulations. No growth effects of *dilp1* or *dilp6* manipulations were  
53 detected during larval development. We next show that *dilp1* and *dilp6*  
54 increase metabolic rate in the late pupa and promote lipids as the primary  
55 source of catabolic energy. This lipid mobilization in the pupa is not correlated  
56 with transcriptional changes of adipokinetic hormone. The effects of *dilp1*  
57 manipulations carry over to the adult fly. In newly eclosed flies, survival during  
58 starvation is strongly diminished in *dilp1* mutants, but not in *dilp2* and *dilp1*-  
59 *dilp2* double mutants, whereas in older flies only double mutants display  
60 reduced starvation resistance. In conclusion, *dilp1* and *dilp6* promote growth  
61 of adult tissues during the non-feeding pupal stage, likely by utilization of  
62 stored lipids. This results in larger newly-eclosed flies with reduced stores of  
63 pupal-derived nutrients and diminished starvation tolerance and fecundity.

64

65

## Introduction

66 The Insulin/IGF signaling (IIS) pathway plays a central role in nutrient-  
67 dependent growth control during development, as well as in adult physiology  
68 and aging [1-5]. More specifically, in mammals insulin, IGFs and relaxins act  
69 on different types of receptors to regulate metabolism, growth and  
70 reproduction [6-9]. This class of peptide hormones has been well conserved  
71 over evolution and therefore the genetically tractable fly *Drosophila* is an  
72 attractive model system for investigating IIS mechanisms [4,10,11]. Eight  
73 insulin-like peptides (DILP1-8), each encoded on a separate gene, have been  
74 identified in *Drosophila* [10,12-14]. The genes encoding these DILPs display

75 differential temporal and tissue-specific expression profiles, suggesting that  
76 they have different functions [12,14-17]. Specifically, DILP1, 2, 3 and 5 are  
77 mainly expressed in median neurosecretory cells located in the dorsal midline  
78 of the brain, designated insulin-producing cells (IPCs) [12,16,18-20]. The IPC  
79 derived DILPs can be released into the open circulation from axon  
80 terminations in the corpora cardiaca, the anterior aorta and the crop. Genetic  
81 ablation of the IPCs reduces growth and alters metabolism, and results in  
82 increased resistance to several forms of stress and prolongs lifespan [18,21].

83 The functions of the individual DILPs produced by the IPCs may vary  
84 depending on the stage of the *Drosophila* life cycle. Already the temporal  
85 expression patterns hint that DILP1-3 and 5 play different roles during  
86 development. Thus, whereas DILP2 and 5 are relatively highly expressed  
87 during larval and adult stages, DILP1 and 6 are almost exclusively expressed  
88 during pupal stages under normal conditions [15,22].

89 DILP1 is unique among the IPC-produced peptides since it can be  
90 detected primarily during the non-feeding pupal stage and the first few days of  
91 adult life when residual larval/pupal fat body is present [15,16]. Furthermore,  
92 in female flies kept in adult reproductive diapause, where feeding is strongly  
93 reduced, *dilp1*/DILP1 expression is also high [16]. Its temporal expression  
94 profile resembles that of DILP6 although this peptide is primarily produced by  
95 the fat body, not IPCs [15,22]. Since DILP6 was shown to regulate growth of  
96 adult tissues during pupal development [15,22], we asked whether also DILP1  
97 plays a role in growth control. It is known that overexpression of several of the  
98 DILPs is sufficient to increase body growth through an increase in cell size  
99 and cell number, and especially DILP2 produces a substantial increase in  
100 body weight [12,23,24]. In contrast, not all single *dilp* mutants display a  
101 decreased body mass. The *dilp1*, *dilp2* and *dilp6* single mutants display  
102 slightly decreased body weight [10,15,22], whereas the *dilp3*, *dilp4*, *dilp5* and  
103 *dilp7* single mutants display normal body weight [10]. However, a triple  
104 mutation of *dilp2*, 3, and 5 causes a drastically reduced body weight, and a  
105 *dilp1-4,5* mutation results in even smaller flies [10,25].

106 There is a distinction between how DILPs act in growth regulation.  
107 DILPs other than DILP1 and 6 promote growth primarily during the feeding  
108 larval stages when their expression is high [12,23]. This nutrient dependent

109 growth is relatively well understood and is critical for production of the steroid  
110 hormone ecdysone and thereby developmental timing and induction of  
111 developmental transitions such as larval molts and pupariation [26-30]. The  
112 growth during non-feeding stages, which affects imaginal discs and therefore  
113 adult tissues, is far less studied. In this study, we investigate the role of  
114 *dilp1*/DILP1 in growth regulation in *Drosophila* in comparison to *dilp6*/DILP6.  
115 We found that mutation of *dilp1* diminishes body weight and ectopic *dilp1*  
116 expression promotes organismal growth during the non-feeding pupal stage,  
117 similar to *dilp6*. Determination of metabolic rate and respiratory quotient as  
118 well as TAG levels during late pupal development provides evidence that *dilp1*  
119 and *dilp6* increase the metabolic rate and that the associated increased  
120 metabolic cost is fueled by increased lipid catabolism. We, however, find no  
121 evidence for a role of the lipid mobilizing adipokinetic hormone (AKH) [31-33]  
122 in the altered lipid catabolism in pupae.

123 We also investigated the role of *dilp1* mutation and overexpression on  
124 early adult physiology. Interestingly, the newly eclosed *dilp1* mutant flies are  
125 less resistant to starvation than controls and *dilp2* mutants. Thus, *dilp1* acts  
126 differently from other *dilps* for which it has been shown that reduced signaling  
127 increases survival during starvation [21]. The decreased starvation resistance  
128 in newly hatched flies after *dilp1* overexpression may be a consequence of  
129 diminishment of stored nutrients in the pupa during the increased growth of  
130 adult tissues, and thus less residual pupal fat body in newborn flies. Also early  
131 egg laying and fecundity are affected by *dilp1*.

132 Taken together, our data suggest that *dilp1*/DILP1 promotes growth of  
133 adult tissues during the non-feeding pupal stage, and that this process mainly  
134 utilizes stored lipids to fuel the increased metabolic rate. The effect of this  
135 increased metabolic rate in the pupa carries over to affect the metabolism in  
136 the young adult fly. We suggest that *dilp1*, similar to *dilp6* [15], ensures that if  
137 a larva is exposed to poor nutritional conditions it will after pupariation utilize  
138 stored nutrients for growth of adult tissues, rather than keeping these stores  
139 for the first days of adult life.

140

141

142

143

144

## Results

145

### Mutation of *dilp1* decreases body weight

146 Growth in *Drosophila* is in part regulated by several of the DILPs through  
147 activation of the canonical IIS/TOR (target of rapamycin) pathway [11,12,28].

148 It was previously reported that decreased *dilp1* activity reduces adult body  
149 weight in *Drosophila*, but it was not investigated at what developmental stage  
150 this occurred [10,19]. This is relevant to ask since *dilp1* displays a restricted  
151 temporal expression during the *Drosophila* life cycle (see Fig 1A). To analyze  
152 growth effects of *dilp1* and possible interactions with its tandem-encoded  
153 paralog *dilp2*, we employed recently generated *dilp1*, *dilp2* and double *dilp1*-  
154 *dilp2* null mutants [34]. The efficacy of these mutants was confirmed by qPCR  
155 in stage 8-9 pupae and immunolabeling in one-week-old mated female flies  
156 (S1 Fig). It can be noted that in *dilp1* mutant pupae the mRNA levels of *dilp2*,  
157 *dilp3* (not shown) and *dilp6* were not altered, but in *dilp6* mutants the *dilp1*  
158 level was upregulated (S1A-C Fig). At the protein level DILP2 but not DILP3  
159 immunofluorescence increased in *dilp1* mutants (S1D-G Fig). These findings  
160 suggest only minor compensatory changes in other dilps/DILPs in *dilp1*  
161 mutants during the pupal stage.

162 We monitored the body weight (wet weight) of *dilp1*, *dilp2* and  
163 *dilp1/dilp2* double mutants. First we measured the body weight both in  
164 newborn and 6-7 day old adult mated *dilp1* mutant flies. In female flies the  
165 newly hatched *dilp1* mutants displayed a decrease in body weight compared  
166 to controls (Fig 1B). However, this difference in body weight was no longer  
167 detectable in 6-7-day-old mated flies kept under normal feeding conditions; a  
168 significant weight increase was observed (Fig 1B). Also *dilp2* mutant female  
169 flies have significantly lower body weight than controls one day after  
170 emergence, but in contrast to *dilp1* mutants they did not increase the weight  
171 over 6-7 days of feeding (Fig 1B). Interestingly the weight of *dilp1/dilp2* double  
172 mutants was not significantly affected compared to the single mutants (and  
173 control) and no weight increase was seen the first week, except in control flies  
174 (Fig 1B). Thus, there was no additive effect of the two mutations. In male flies  
175 none of the mutant flies displayed altered body weight (Fig 1C). To determine

176 whether decreased organismal growth was responsible for the lower body  
177 weight we measured wing size in the female mutant flies and found no  
178 significant difference to controls (Fig 1D). Thus, the decreased weight of the  
179 flies does not seem to reflect a significant decrease in organismal size.

180 We next asked whether the weight gain over the first 6-7 days seen in  
181 Fig 1B was caused by increased feeding. Using a capillary feeding (CAFE)  
182 assay over four days, we found that during the first day of assay the *dilp1*  
183 mutant flies actually fed less than the other mutants and control flies (Fig 1E).  
184 The subsequent days food intake was not significantly different between the  
185 genotypes. Thus, the food intake profile does not explain the weight gain over  
186 the 6-7 days (Fig 1E); possibly the female *dilp1*<sup>-/-</sup> flies excrete less waste or  
187 spend less energy. It was shown earlier that 1 week old *dilp1* mutant flies  
188 display a two-fold increased expression of *dilp6* transcript [16], that might  
189 compensate for the loss of *dilp1*. However, in the midpupal stage there is no  
190 significant upregulation of *dilp6* in *dilp1* mutants (S1C Fig).

191 In a study of *dilp6* it was shown that if third instar larvae (after reaching  
192 critical size) were put on a low protein diet, they emerged as smaller adults  
193 and that this was accentuated in *dilp6* mutants [15]. This suggests that *dilp6* is  
194 important for assuring growth of adult tissues under low protein conditions.  
195 We, thus, performed a similar experiment with *dilp1* mutant larvae kept on  
196 normal food or low protein diet. Flies emerging from larvae on restricted  
197 protein indeed displayed significantly lower body weight and female *dilp1*  
198 mutants weighed less than controls under protein starvation (Fig 1F). In male  
199 flies this latter effect was not seen in the mutants (Fig 1G).

200 We then asked whether mutation of both *dilp1* and *dilp6* would result in  
201 a further decrease of body weight and generated a recombinant *dilp1-dilp6*  
202 mutant. Using qPCR we found that these flies displayed virtually no  
203 detectable *dilp1* and *dilp6* RNA (S2A Fig.). The weights of *dilp1/dilp6* mutants  
204 were significantly reduced compared to controls (S2B Fig.). However, their  
205 weights were not diminished more than those of the single *dilp1* and *dilp6*  
206 mutants, indicating that there was no additive effect of loss of both *dilps*.

207

208

209

210 **Overexpression of *dilp1* promotes growth during the non-feeding**  
211 **pupal stage**

212 Having shown effects of the *dilp1* null mutation on adult flyweight we next  
213 explored the outcome of over-expressing *dilp1*, either in IPCs, or more  
214 broadly. For this we generated several UAS-*dilp1* lines [see [34]]. These UAS-  
215 *dilp1* lines were verified by DILP1 immunolabeling after expression with  
216 several Gal4 drivers (S3A-D Fig) and by qPCR in stage 8-9 pupae (S4A-F  
217 Fig). Overexpression of *dilp1* in fat body (*ppl*-Gal4 and *to*-Gal4) and IPCs  
218 (*dilp2*-Gal4) results in a drastic upregulation of *dilp1* RNA (S4A, D Fig), but  
219 has no effect on *dilp2* and *dilp6* expression (S4B, C, E, F Fig), except a minor  
220 decrease in *dilp2* for *ppl*-Gal4 (S4B Fig). At the protein level *dilp1*  
221 overexpression resulted in minor changes in DILP2, 3 and 5 immunolevels in  
222 IPCs of one week old adult female flies (S5A-E Fig). One line, UAS-*dilp1* (III),  
223 was selected for subsequent experiments since it generated the strongest  
224 DILP1 immunolabeling.

225 First, we used a *dilp2*-Gal4 driver to express *dilp1* in the IPCs and  
226 detected a significant increase in body weight of female flies (Fig 2A). We  
227 then expressed *dilp1* in the fat body, the insect functional analog of the liver  
228 and white adipocytes in mammals [35-37]. The fat body displays nutrient  
229 sensing capacity, and is an important tissue for regulation of growth and  
230 metabolism in *Drosophila* [15,37-41]. It is also the tissue where DILP6 is  
231 produced and released [15,38]. To investigate the effect of ectopic *dilp1*  
232 expression in the fat body, we used the fat body-specific *pumpless* (*ppl*) and  
233 *takeout* (*to*) Gal4 drivers. The efficiency of the drivers was confirmed by  
234 DILP1 immunostaining of larval fat body of *ppl*>*dilp1* and *to*>*dilp1* flies, but not  
235 in the control flies (S3D Fig). In *ppl*>*dilp1* flies we also found DILP1 labeling in  
236 the nephrocytes (not shown), which are highly endocytotic cells located close  
237 to the heart [42]. The immunoreactive DILP1 is likely to have accumulated  
238 from the circulation after release from the fat body since the *ppl*-Gal4 is not  
239 expressed in the nephrocytes.

240 Before monitoring the effect of *dilp1* overexpression in the fat body on  
241 adult body weight and organismal size, we wanted to determine whether *dilp1*  
242 has an effect on larval development. We therefore measured the time to  
243 pupariation and size of pupae to determine whether *dilp1* overexpression

244 affected timing of larval development and growth during this stage. Using the  
245 *ppl*-Gal4 driver we did not observe any effect on the time from egg to pupa  
246 compared to controls (Fig 2B). Pupal volume, as a measurement of larval  
247 growth, was not altered by *ppl*-Gal4>*dilp1* (Fig. 2C). As expected [15,38],  
248 over-expression of *dilp6* also had no effect on pupal size (Fig 2C). However,  
249 as shown earlier for ubiquitously expressed *dilp2* [23], *dilp2* expression in the  
250 fat body generated a strong increase in pupal volume, suggesting growth  
251 during the larval feeding stage (Fig 2C). Driving *dilp1* with the *c929* Gal4 line,  
252 that directs expression to several hundred *dimm*-expressing peptidergic  
253 neurons including IPCs [43], we did not observe any effect on time to  
254 pupariation or pupal volume (Fig 2B, C). Taken together our data suggest the  
255 ectopic *dilp1* does not affect larval growth or developmental time.

256 Next, we determined the body weight of mated 6-7 d old flies. Body  
257 weight increased significantly in *ppl*>*dilp1* flies compared to the controls both  
258 in female (Fig 2D) and male flies (Fig 2E). Here we additionally noted  
259 increased weight for *ppl*>*dilp2* and *ppl*>*dilp6* flies. We also monitored the  
260 weight of one day old flies and found that *ppl*>*dilp1*, but not *dilp2*>*dilp1* flies  
261 displayed increased weight (Fig 2F). However, *dilp2*>*dilp1*-RNAi induced a  
262 decrease in body weight (Fig 2F). Moreover, organismal size, estimated by  
263 wing size (Fig 2G, H) and thorax length (Fig 2G, I), increased after ectopic  
264 expression of *dilp1* in the fat body. Since we see no effect of *dilp1* expression  
265 on developmental time or pupal volume, but register increased body weight  
266 and size of adults, we propose that *dilp1*, like *dilp6*, promotes growth of adult  
267 tissues during the pupal stage.

268 It was suggested that *dilp6* promotes growth of adult tissues during  
269 pupal development by utilizing nutrients stored in the larval fat body, which is  
270 carried into the pupa [15]. This may be the case also for *dilp1*, and if so, newly  
271 hatched *dilp1* overexpressing flies should have less energy stores in the form  
272 of residual larval fat body. To test this we monitored feeding in recently  
273 hatched *dilp1* mutant flies and controls. Indeed, flies overexpressing *dilp1*  
274 displayed increased food ingestion over the first four days after adult  
275 emergence compared to controls (Fig 2J). Next we compared the weights of  
276 one day old and 6-7 day old flies after *dilp1* overexpression with *ppl*-Gal4 and  
277 found that at both ages the female *ppl*>*dilp1* flies weighed more than controls



278 and that the older flies were heavier than the younger ones (Fig 2K). In male  
279 flies *pp1>dilp1* also increased the body weight, but there was a loss of weight  
280 for all genotypes over the first 6-7 days of adult life (S6A Fig). As a  
281 comparison *dilp2>dilp1* had only minor effects on body weight of female flies,  
282 only in 6-7 d old flies there was an increase (S6B Fig), whereas in males a  
283 significant increase was noted at both ages for *dilp2>dilp1*, and a loss of  
284 weight over the next six days for all genotypes (S6C Fig).

285 Using the *to*-Gal4 fat body driver to express *dilp1* we also noted an  
286 increase in weight of recently emerged female and male flies (S6D, E Fig), but  
287 no change in body size except a minor increase in thorax length in females  
288 (S6F, G Fig). The female *to>dilp1* flies increased further in weight the first 6-7  
289 days of adult life, but not later (S6D Fig), whereas the males did not (S6E Fig).  
290 Furthermore, with the *to*-Gal4 driver there was no increase in pupal volume,  
291 supporting that *dilp1* does not affect larval growth (S6H Fig).

292 Ectopic expression of *dilp1* in neuroendocrine cells by means of the  
293 *c929*-Gal4 increased adult body weight (S7A Fig), but had no effect on wing  
294 size in males and females or food intake in young flies (S7B, C Fig),  
295 suggesting that *dilp1* expression (and/or systemic release) was not strong  
296 enough to yield major effects. Also *dilp2>dilp1* flies were tested in food intake  
297 and no effect was seen (S7C Fig).

298

### 299 **Overexpression of *dilp1* increases the size of the adult brain and** 300 **neuroendocrine cells**

301 It was previously shown that signaling through the *Drosophila* insulin receptor  
302 (dInR) can lead to an enlargement of cell bodies of neuroendocrine cells in a  
303 cell autonomous manner, and that *dilp6* in glial cells is a candidate ligand to  
304 mediate this dInR dependent growth [44,45]. Since *dilp1* has a temporal  
305 expression profile similar to *dilp6*, and promotes growth of adult tissues in the  
306 pupal stage, we asked whether *dilp1* also affects size of neuroendocrine cells  
307 that differentiate in the pupa. Thus, we overexpressed *dilp1* with the broad  
308 neuroendocrine cell driver *c929*-Gal4 [43,46], and monitored the cell body  
309 size of several groups of neuroendocrine cells in the adult CNS with specific  
310 peptide antisera. We found that the cell body size of IPCs increased in adult  
311 *c929>dilp1* flies, as shown by anti-DILP2 staining (S8A1-3 Fig, Table 1).

312 Furthermore, the cell bodies of the adult-specific pigment-dispersion factor  
313 (PDF) expressing clock neurons (I-LN<sub>v,s</sub>), as shown here by anti-PDF staining,  
314 were enlarged in *c929>dilp1* flies compared to the controls (S8B1-3 Fig, Table  
315 1). Next, we monitored the cell-body size of leucokinin (LK) producing  
316 neurons in the abdominal ganglia (ABLKs), and found that the adult-specific  
317 anterior, but not the larval-derived posterior ABLKs, displayed increased size  
318 in *c929>dilp1* flies (S8C1-3 Fig, Table 1).

319 However, the observed increase in cell body size appears to be partly  
320 due to a broader growth of the adult fly tissues, since we found that also the  
321 size of the brain increased in *c929>dilp1* flies (S8D Fig, Table 1). The *c929*-  
322 Gal4 is expressed in IPCs and several other groups of peptidergic  
323 neurosecretory cells [43,46], which could be the source of systemic release of  
324 ectopic DILP1 that affects brain and cell growth. To support that systemic  
325 DILP1 is required to promote this growth we employed the *pp1*-Gal4 to drive  
326 *dilp1* in the fat body and found an increase in the size of the PDF expressing  
327 clock neurons (S8F1-3 Fig, Table 1) and the brain (S8G Fig, Table 1). In  
328 contrast, we found that expressing *dilp1* in interneurons, such as PDF-  
329 expressing clock neurons does not induce growth of brain neurons (S9A, B  
330 Fig, Table 1) or size of the brain (S9C Fig, Table 1), but affected the intensity  
331 of PDF immunolabeling (S9D Fig). Thus, paracrine release of DILP1 in the  
332 brain does not seem to affect growth of neurons. Interestingly, we found that  
333 in third instar larvae, the cell body size of ABLK neurons or the size of the  
334 CNS were not different in *c929>dilp1* larvae compared to controls (S9E-G Fig,  
335 Table 1), further supporting that *dilp1* overexpression has no effect on cell  
336 growth during the larval stage. Finally, since overexpression of *dilp6* in glial  
337 cells by *Repo*-Gal4 promotes increase in size of neuronal cell bodies [45], we  
338 tested overexpression of *dilp1* in these cells, but found no significant effect on  
339 the cell-body size of PDF neurons (S10A, B Fig, Table 1). This again indicates  
340 that to affect cell/tissue growth DILP1 must act systemically rather than in a  
341 paracrine fashion.

342

343

344

345 **Table 1.** Overexpression of *dilp1* in neurosecretory cells and fat body affects  
 346 size of brain and certain neurons  
 347

| Genotype              | Neuron/tissue <sup>1</sup> | Size change | Significance | Figure       |
|-----------------------|----------------------------|-------------|--------------|--------------|
| <i>c929&gt;dilp1</i>  | IPC                        | +           | p<0.001      | S Fig. 7A    |
| <i>c929&gt;dilp1</i>  | I-LNv                      | +           | p<0.01       | S Fig. 7B    |
| <i>c929&gt;dilp1</i>  | ABLK <sub>a</sub>          | +           | p<0.05       | S Fig. 7C    |
| <i>c929&gt;dilp1</i>  | ABLK <sub>p</sub>          | nc          | ns           | S Fig. 7C    |
| <i>c929&gt;dilp1</i>  | Whole brain                | +           | p<0.001      | S Fig. 7D    |
| <i>c929&gt;dilp1</i>  | ABLK larva                 | nc          | ns           | S Fig. 8E, F |
| <i>c929&gt;dilp1</i>  | CNS larva                  | nc          | ns           | S Fig. 8G    |
| <i>dilp2&gt;dilp1</i> | IPC                        | nc          | ns           | S Fig. 7E    |
| <i>ppl&gt;dilp1</i>   | I-LNv                      | +           | p<0.01       | S Fig. 7G    |
| <i>ppl&gt;dilp1</i>   | Whole brain                | +           | p<0.05       | S Fig. 7H    |
| <i>pdf&gt;dilp1</i>   | I-LNv                      | nc          | ns           | S Fig. 8A, B |
| <i>pdf&gt;dilp1</i>   | Whole brain                | nc          | ns           | S Fig. 8C    |
| <i>repo&gt;dilp1</i>  | I-LNv                      | nc          | ns           | S Fig. 9A, B |

348 Notes

349 +, increased size

350 nc, no change

351 ns, not significant

352 <sup>1</sup> Neurons or tissues monitored for size

353

354 **Metabolic rate and respiratory quotient in pupae of different genotypes**

355 To investigate the role of *dilp1* in utilization of nutrients during pupal  
 356 development we determined metabolic rate (MR) and respiratory quotient (RQ)  
 357 in pupae of different genotypes. First we characterized the metabolic  
 358 trajectory in control pupae (*w<sup>1118</sup>*) by measuring cumulative MR daily  
 359 throughout pupal development (Fig 3A). These data show the exponential MR  
 360 curve typical for developing insects, including *D. melanogaster* [47]. To  
 361 minimize handling stress, we chose to investigate only the end of pupal  
 362 development in more detail and measured MR and RQ in 4-day-old pupae  
 363 (that is the cumulative MR between hours 96 and 120 after pupation). For this  
 364 experiment we used only *ppl*-Ga4 overexpression animals, since the mutant

365 animals displayed high mortality in the respirometry setup used here. As can  
366 be seen in Fig 3B and 3C the *ppl>dilp1* and *ppl>dilp6* differed significantly  
367 from the controls. The MR was higher and RQ lower in the overexpression  
368 flies than in the control flies. RQ values, around 0.6 in both overexpression  
369 lines, suggest pure lipid metabolism [48], and lipids are known to be a major  
370 or sole fuel during metamorphosis of insects [49,50]. Our findings strongly  
371 suggest that *dilp1* (and *dilp6*) affects metabolism in the pupa, maybe to  
372 ensure that enough fuel is allocated for growth of adult tissues.

373

### 374 **TAG, carbohydrates and AKH signaling in pupae of different genotypes**

375 To determine whether it indeed are lipids that fuel growth of adult tissues in 4  
376 day old pupae we determined TAG levels after over expression of *dilp1* and  
377 *dilp6* in fat body (*ppl-Gal4*). Pupae of both genotypes displayed increased  
378 weight (Fig. 3D) and also significantly reduced TAG levels (Fig. 3E),  
379 compared to controls of the same age. The decreased glycogen levels in  
380 pupae after ectopic expression of *dilp1* and *dilp6* were not significant (Fig. 3F)  
381 and glucose levels were not significantly changed (S11 Fig).

382 Since AKH is known to mobilize lipids in insects, including *Drosophila*  
383 [31-33,51], we determined levels of *akh* transcript in pupae with *dilp1* and  
384 *dilp6* overexpression (using *ppl-Gal4*) and in *dilp* mutants, at two different time  
385 points (2 and 4 d old pupae). There was no significant alteration in *Akh*  
386 transcript after *dilp1* or *dilp6* overexpression; the only phenotype was a slight  
387 upregulation in *dilp1* mutants in 4 d pupae (S11A-D Fig). Next we analyzed  
388 levels of transcript of brummer (*bmm*), a lipase known to promote TAG  
389 mobilization [52], in pupae of the same stages and found no significant  
390 change in expression for any genotype (S11E-H Fig). We also measured  
391 transcript of the  $\alpha$ -glucosidase *tobi*, which regulates glycogen levels and is a  
392 target of both DILPs and AKH [53], and found no effect of overexpression (not  
393 shown) or loss of function of *dilp1* at either stage (S11 I, J Fig).

394

395

396

397 **Effects of *dilp1* manipulations on metabolism in newly eclosed and**  
398 **young flies**

399 To investigate whether energy reallocation during pupal development affects  
400 adult physiology and metabolism, we monitored the levels of triacylglycerids  
401 (TAG), glycogen and glucose in recently emerged and three day old *dilp*  
402 mutant and *dilp1*-overexpressing female flies (Fig 4). In newborn *dilp1* mutant  
403 flies glycogen was significantly lowered, whereas glucose and glycogen was  
404 diminished in *dilp2* mutants, while in the *dilp1/dilp2* double mutants all three  
405 compounds were decreased (Fig 4A-C). In the three-day-old flies *dilp1* and  
406 double mutants displayed reduced glycogen, whereas in *dilp1/dilp2* double  
407 mutants TAG was increased (Fig 4D-F). Using *ppl-Ga4* to express *dilp1* we  
408 found that the only effect was a reduction of glycogen in newborn flies; at 3 or  
409 7 days of age no effect was noted (Fig 4G-I). Thus, it appears that intact *dilp1*  
410 signaling is required for mobilization of glycogen stores in newly emerged and  
411 young flies. This supports that *dilp1* signaling in the late pupa affects  
412 metabolism and that this is carried over into the young adult.

413

414 **Effects of *dilp1* on adult physiology**

415 Genetic ablation of the IPCs, which produce DILP1, 2, 3 and 5, results in  
416 enhanced starvation resistance in adult flies [21]. Thus, we asked whether the  
417 alterations of *dilp1* expression during pupal development have effects on adult  
418 physiology such as survival during starvation or desiccation (as a proxy for  
419 effects on metabolism). We investigated the starvation resistance in newly  
420 emerged, three days old and one-week-old female *dilp1*, *dilp2* and *dilp1/dilp2*  
421 double mutant flies. The newly eclosed *dilp1* mutant flies display strongly  
422 reduced survival during starvation and double mutants increased survival  
423 compared to control flies, whereas the starvation resistance of *dilp2* mutants  
424 is similar to the controls (Fig. 5A, Table 1). In three days old virgin flies the  
425 *dilp1* and *dilp1/dilp2* mutants display reduced survival during starvation,  
426 whereas the *dilp2* mutants perform similar to the controls (Fig 5B, Table 1). In  
427 a separate study [34] it was shown that 6-7 day old female flies display a  
428 similar response to starvation: the *dilp1/dilp2* mutants exhibit the strongest  
429 reduction in survival, followed by *dilp1* mutants that also are much less stress  
430 tolerant, whereas *dilp2* mutants and control flies perform very similar (see

431 Table 1). Here we tested also 6-7 day old male flies and found that they  
432 survived starvation in a manner different from females with *dilp2* and double  
433 mutants displaying diminished stress resistance whereas *dilp1* mutants  
434 survive similar to controls (S12A Fig).

435

436 **Table 2.** Median lifespans of female flies exposed to starvation.

437

| Genotype                  | Median lifespan (calculated as % of $w^{1118}$ ) |              |               |
|---------------------------|--------------------------------------------------|--------------|---------------|
|                           | Newly eclosed                                    | 3 d adults   | 6-7 d adults* |
| $w^{1118}$                | 100                                              | 100          | 100           |
| <i>dilp1</i> -/-          | 83 (p<0.001)                                     | 86 (p<0.001) | 78 (p<0.001)  |
| <i>dilp2</i> -/-          | 100                                              | 100          | 100           |
| <i>dilp1-dilp2</i> -/-    | 107 (p<0.001)                                    | 76 (p<0.001) | 67 (p<0.001)  |
|                           |                                                  |              |               |
| <i>ppl</i> > $w^{1118}$   | 100                                              | -            | 100           |
| <i>ppl</i> > <i>dilp1</i> | 80 (p<0.001)                                     | -            | 90 (p<0.001)  |

438

439 \* Data from Post et al. [34]

440

441 As seen above, our data suggest a change in the response to loss of  
442 *dilp* function over the first week of adult life. It is known that newly hatched  
443 wild type flies are more resistant to starvation than slightly older flies [54].  
444 Thus, we compared the survival during starvation in recently emerged and  
445 three day old virgin flies. As seen in Fig 5C (based on data in Fig 5A and B),  
446 recently hatched control flies ( $w^{1118}$ ) indeed exhibit increased starvation  
447 resistance compared to controls that were tested when three days old. Also  
448 the *dilp1* mutant flies are more starvation resistant when tested as newly  
449 hatched than as older flies, and the mutants perform less well than controls at  
450 both ages (Fig 5D). However, the most drastic change within the first week is  
451 that *dilp1* mutants yield the strongest phenotype as newborn flies and then in  
452 3d and 6-7 d old flies the *dilp1/dilp2* mutants are the ones with the lowest  
453 stress resistance. Thus, a change in the role of *dilp1* seems to occur as the fly  
454 matures during the first few days of adult life. To provide additional evidence  
455 that *dilp1* impairs starvation resistance we performed *dilp1*-RNAi using a  
456 *dilp2*-Gal4 driver. The efficiency of the *dilp2*>*dilp1*-RNAi was tested by qPCR  
457 (S13A Fig) where a strong decrease in *dilp1*, but not *dilp2* or *dilp6* was seen.

458 The *dilp1*-RNAi resulted in newly eclosed flies that displayed reduced survival  
459 during starvation (S13B Fig), similar to *dilp1* mutant flies.

460 It is also interesting to note that the diminished starvation resistance in  
461 *dilp1* and *dilp1/dilp2* mutants is opposite to the phenotype seen after IPC  
462 ablation, mutation of *dilp1-4*, or diminishing IIS by other genetic interventions  
463 [10,21,55,56]. Thus, in recently hatched flies *dilp1* appears to promote  
464 starvation resistance rather than diminishing it. Furthermore, the decreased  
465 survival during starvation in female *dilp1* mutants is the opposite of that shown  
466 in *dilp6* mutants [15], indicating that *dilp1* action is different from the other  
467 insulin-like peptides.

468 Next we investigated the effect of the mutations on the flies' response  
469 to desiccation (dry starvation). One-week-old flies were put in empty vials and  
470 survival recorded. Female *dilp1/dilp2* mutants were more sensitive to  
471 desiccation than controls and the single mutants (Fig 5D). In males the double  
472 mutants also displayed higher mortality during desiccation, whereas the two  
473 single mutants were more resistant than controls (S12B Fig). Thus, there is a  
474 sex dimorphism in how the different mutants respond to both desiccation and  
475 starvation.

476 When overexpressing *dilp1* with the fat body driver *ppl*-Gal4 newly  
477 eclosed and 6-7 d old female flies become less resistant to starvation  
478 compared to parental controls (Fig 6A, B). However, in 6-7-day-old male flies  
479 there is no difference between controls and flies with ectopic *dilp1*, using *ppl*-  
480 and *c929*-Gal4 drivers (S13C-D Fig). We furthermore investigated starvation  
481 resistance in flies overexpressing *dilp1* in IPCs (*dilp2>dilp1*) and in most  
482 neuroendocrine cells (*c929>dilp1*) and found that in newborn flies  
483 overexpression reduced survival (Fig 6C, E), whereas in a week old flies all  
484 genotypes displayed the same survival (Fig 6D, F). Thus, in females it  
485 appears as if both knockout and over expression of *dilp1* reduces starvation  
486 resistance, maybe due to offsetting a narrow window of homeostasis. It was  
487 shown earlier that conditional knockdown of *dilp6* by RNAi during the pupal  
488 stage resulted in newborn flies with *increased* survival during starvation [15],  
489 suggesting that the effect the *dilp1* null mutation is different.

490 After ectopic expression of *dilp1* in the fat body there was an increase  
491 in food intake (cumulative data) in one-week-old flies over four days (Fig 7A),

492 suggesting that metabolism is still altered in older flies. Since the effect of  
493 *dilp1* manipulations seems stronger in female flies we asked whether  
494 fecundity is affected by overexpression of *dilp1*. An earlier study showed that  
495 *dilp1* mutant flies are not deficient in number of eggs laid, or the viability of  
496 offspring (egg to pupal viability), although the *dilp1/dilp2* double mutants  
497 displayed a reduction in viability of these eggs [34]. Here, we expressed *dilp1*  
498 in fat body (*ppl-Gal4*) and detected an increase in number of eggs laid over 24  
499 h in 6-7 d old flies (Fig. 7B). Both *ppl-Gal4*- and *c929-Gal4*-driven *dilp1*  
500 decreased the viability of eggs laid as monitored by numbers of eggs that  
501 developed into pupae (Fig 7C). As a comparison we noted no difference in  
502 number of eggs in 3-day-old *dilp1* mutant flies (Fig. 7D).

503 We next asked whether there is any physiological trigger of increased  
504 *dilp1* expression in adult flies, except for diapause [16] and experimental ones  
505 such as ectopic expression of sNPF or knockdown of *dilp6*, *dilp2* and *dilp2,3,5*  
506 [16,34,57]. Although diminished protein diet in larvae had no effect on *dilp1*  
507 expression measured by immunolabeling (not shown), we found that 40 h  
508 starvation of 10 d old flies (*w<sup>1118</sup>*) leads to a significant increase in *dilp1*, but  
509 not in *dilp2* or *dilp6* (Fig 7E). Thus, at a time (12 d) when *dilp1* is very low  
510 under normal conditions, it is upregulated four times during starvation, further  
511 suggesting that the peptide indeed plays a role also in older adult flies.

512 The functional homolog of glucagon in flies, AKH, plays important roles  
513 both in lipid mobilization, metabolism and regulation of lifespan [31,51,58,59].  
514 A previous paper showed that in *dilp1* mutant flies levels of AKH were not  
515 affected [34]. Here we found that *dilp1* overexpression with the *c929-Gal4*  
516 driver induced an increase in AKH immunolabeling in one-week-old flies (Fig  
517 7F). Thus in adult flies (in contrast to larvae) there appears to be an  
518 interaction between *dilp1* and AKH that may underlie some of the effects of  
519 this DILP on metabolism and stress tolerance.

520

521

## Discussion

522 Our study indicates a role for *dilp1* in regulation of adult tissue growth during  
523 the pupal stage, as well as a function in adult physiology, especially during the  
524 first days of adult life. The experiments herein suggest that the developmental



525 role of *dilp1* may be to ensure nutrient utilization in the pupa to support growth  
526 of adult tissues if the larva was exposed to restricted food sources. In the  
527 adult *dilp1* is upregulated during starvation and genetic gain and loss of  
528 function of *dilp1* signaling alters the flies' survival under starvation conditions.  
529 These novel findings combined with previous data showing high levels of *dilp1*  
530 during adult reproductive diapause [16] and its role as a pro-longevity factor  
531 during aging [34] demonstrate a wide-ranging importance of this signaling  
532 system. Not only does *dilp1* expression correlate with stages of non-feeding  
533 (or reduced feeding), these stages are also associated with lack of  
534 reproductive activity, and encompass the pupae, newly eclosed flies, and  
535 diapausing flies. Under normal conditions, the diminishing *dilp1*/DILP1  
536 expression during the first few days of adult life may be associated with a  
537 metabolic transition (fat body remodeling; [60]) and the onset of sexual  
538 maturation.

539         In *Drosophila*, the final body size is determined mainly during the larval  
540 feeding stage [11,12,23,29]. However, regulation of adult body size can also  
541 occur after the cessation of the feeding stage, and this process is mediated by  
542 *dilp6* acting on adult tissue growth in the pupa in an ecdysone-dependent  
543 manner [15,38]. This is likely a mechanism to ensure growth of the adult  
544 tissues if the larva is exposed to shortage of nutrition during its feeding stage.  
545 Our findings suggest that *dilp1* is another regulator of growth during the pupal  
546 stage. We show here that *dilp1* promotes organismal growth in the non-  
547 feeding pupa at the cost of stored nutrients derived from the larval stage. This  
548 is supported by RQ-data that clearly shows a shift from mixed-energy  
549 substrate energy metabolism in control flies towards almost pure lipid  
550 catabolism at the end of pupal development in the *dilp1* overexpression flies  
551 (also seen for *dilp6*). Furthermore, TAG (but not carbohydrate) levels in *dilp1*  
552 overexpression flies were clearly decreased, which likely reflects the shift in  
553 catabolic energy substrate also seen in the R/Q using respirometry. It should  
554 be noted that insects predominantly use lipids as fuel during metamorphosis  
555 [49,50] and *dilp1* overexpression increases lipid catabolism. As a  
556 consequence large *dilp1*-overexpressing flies display increased food ingestion  
557 over the first four days as adults and an altered response to starvation.  
558 Conversely *dilp1* mutants hatched as flies with significantly smaller weight.

559 Both alterations in *dilp1* expression influence the metabolic balance in early  
560 adults as manifested in reduced starvation resistance at this stage. Our study  
561 hence suggests that *dilp1* parallels *dilp6* [15,38] in balancing adult tissue  
562 growth and storage of nutrient resources during pupal development, and  
563 thereby probably affecting adult physiology. This is interesting since *dilp6* is  
564 an IGF-like peptide that is produced in the nutrient sensing fat body [15,38],  
565 whereas the source of the insulin-like *dilp1* is the brain IPCs.

566 We showed earlier that young adult *dilp1* mutant flies display increased  
567 *dilp6* and vice versa [16], suggesting feedback between these two peptide  
568 hormones. This feedback appears less prominent in *dilp1* mutants during the  
569 pupal stage with no effects on *dilp2*, *dilp3* or *dilp6* levels. However, *dilp1* is  
570 slightly upregulated in *dilp6* mutant pupae. Furthermore, overexpression of  
571 *dilp1* in fat body or IPCs has no effect on pupal levels of *dilp2* and *dilp6*. Thus,  
572 at present we cannot postulate any compensatory changes in other DILPs in  
573 pupae with *dilp1* manipulations. However, under normal conditions *dilp6*  
574 levels are far higher than those of *dilp1* [38] (see also [modENCODE mRNA-Seq tissues](#) [61]), which could buffer the effects of changes in *dilp1* signaling.

576 Ectopic overexpression of *dilp1* in neuroendocrine cells or fat body not  
577 only increases growth of wings and thorax, but also increases the size of the  
578 brain and the cell bodies of several kinds of neuroendocrine cells in adult flies.  
579 However, there was no change in the size of neuronal cell bodies or CNS  
580 during larval development after overexpression of *dilp1*. Thus, taken together,  
581 our findings suggest that *dilp1*/DILP1 promotes growth mainly during the non-  
582 feeding pupal stage. Interestingly, restricted protein diet during the later larval  
583 stage diminished the body weight of adult flies more in *dilp1* mutants than in  
584 controls, similar to findings for *dilp6* [15]. This suggests that *dilp1* function is  
585 accessory to *dilp6* in maintaining growth of adult tissues in situations where  
586 larvae obtain insufficient protein in their diet.

587 DILPs and IIS are involved in modulating responses to starvation,  
588 desiccation and oxidative stress in *Drosophila* [see [10,21,62]]. Flies with  
589 ablated IPCs or genetically diminished IIS display increased resistance to  
590 several forms of stress, including starvation [10,21]. Conversely,  
591 overexpression of *dilp2* increases mortality in *Drosophila* [24]. We found that  
592 *dilp1* mutant flies displayed diminished starvation resistance. Both in newborn

593 and 3 day old flies, mutation of *dilp1* decreased survival during starvation (but  
594 not in 6-7 day old ones). Curiously, overexpression of *dilp1* in the fat body  
595 also resulted in decreased survival during starvation in young and older flies.  
596 The effects on adult physiology of *dilp1* manipulations may be a consequence  
597 of the altered adult tissue growth during pupal development and associated  
598 increase in utilization of nutrient stores. Action of *dilp1* in the adult fly is also  
599 linked to reproductive diapause in females, where feeding is strongly reduced  
600 [63], and both peptide and transcript are upregulated [16]. Related to this we  
601 found here that *dilp1* mRNA is upregulated during starvation in 12 d old flies.  
602 Furthermore, it was shown that expression of *dilp1* increases lifespan in *dilp1*-  
603 *dilp2* double mutants, suggesting that loss of *dilp2* induces *dilp1* as a factor  
604 that promotes longevity [34]. Thus, *dilp1* activity is beneficial also during adult  
605 life, even though its expression under normal conditions is very low [15,16,38].  
606 This pro-longevity effect of *dilp1* is in contrast to *dilp2*, 3 and 5 and the  
607 mechanisms behind this effect are of great interest to unveil.

608 A previous study showed that in wild-type (Canton S) *Drosophila* DILP1  
609 expression in young adults is sex-dimorphic with higher levels in females [16].  
610 In line with this, we show here that increase in body weight the first week of  
611 adult life occurs only in female *dilp1* mutant flies, and also that starvation  
612 survival in one-week-old flies is diminished only in females. Finally, we found  
613 that *dilp1* overexpression specifically decreased starvation resistance only in  
614 female flies. Thus, taken together, we found earlier that *dilp1* displays a sex-  
615 specific expression [16] and here we show sex-specific function in young adult  
616 *Drosophila*, and the *dilp1* mutation affects body weight of newly eclosed flies  
617 mainly in females. It is tempting to speculate that the more prominent role of  
618 *dilp1* in female flies is linked to metabolism associated with reproductive  
619 physiology and early ovary maturation, which is also reflected in the *dilp1*  
620 upregulation during reproductive diapause [16]. In fact, we show here that  
621 egg-laying increased after *dilp1* overexpression, and an earlier study  
622 demonstrated a decreased egg laying in *dilp1* mutant flies [16].

623 This study demonstrates that *dilp1* promotes growth of adult tissues  
624 during the pupal stage, and in females it influences starvation resistance  
625 during the young adult stage, and affects fecundity. Like *dilp6*, perhaps *dilp1*  
626 acts as a signal promoted by nutrient shortage during the late larval stage to

627 ensure growth of adult tissues by recruiting nutrient stores from larval fat body.  
628 This in turn results in depleted pupal-derived nutrient stores in young adults.  
629 Thus, IPC-derived *dilp1* displays several similarities to the fat body-produced  
630 *dilp6*, including temporal expression pattern, growth promotion, effects on  
631 adult stress resistance and lifespan. Additionally *dilp1* may play a role in  
632 regulation of nutrient utilization/metabolism during the first few days of adult  
633 life, especially in females. At this time larval fat body is still present and  
634 utilized as energy fuel/nutrient store [54] and also contribute to egg  
635 development [64]. Curiously, there is a change in the action of DILP1 between  
636 the pupal and adult stages from being a stimulator of growth (agonist of dInR)  
637 in pupae, to acting opposite to DILP2 and other DILPs in adults in regulation  
638 of lifespan and stress responses. It is not known what mechanism is behind  
639 this switch in function of DILP1 signaling, but one possibility is that DILP1 acts  
640 via different signaling pathways downstream the dInR in pupae and adults.  
641 One obvious difference between these two stages is the presence of larval fat  
642 body in the pupa and first few days of adults and its replacement by functional  
643 adult fat body in later stages [37,54]. Also there seems to be a difference in  
644 the interactions with AKH signaling. During pupal development we did not see  
645 any effect of *dilp1* on transcripts of *Akh* or *tobi*, whereas in adult flies *Akh*  
646 expression is induced by *dilp1* [34]. This is in agreement with earlier work,  
647 which showed that AKH plays no role in development or lipid and  
648 carbohydrate metabolism in the pupa [51]. In the future it would be interesting  
649 to investigate whether DILP1 acts differently on larval/pupal and adult fat body,  
650 or act on different downstream signaling in the two stages of the life cycle,  
651 and whether *dilp1* and *dilp6* interact to regulate growth and metabolism in  
652 *Drosophila*.

653

654

## Experimental procedures

655

### Fly lines and husbandry

656 Parental flies were reared and maintained at 18°C with 12:12 Light:Dark cycle  
657 on food based on a recipe from Bloomington *Drosophila* Stock Center (BDSC)  
658 ([http://fly-stocks.bio.indiana.edu/Fly\\_Work/media-recipes/bloomfood.htm](http://fly-stocks.bio.indiana.edu/Fly_Work/media-recipes/bloomfood.htm)).

659 The experimental flies were reared and maintained at 25°C, with 12:12  
660 Light:Dark cycle on an agar-based diet with 10% sugar and 5% dry yeast.

661 The following Gal4 lines were used in this study: *dilp2*-Gal4 [[18] from  
662 E. Rulifson, Stanford, CA], *Pdf*-Gal4 (obtained from BDSC, Bloomington, IN),  
663 *ppl*-Gal4 [[65] from M.J. Pankratz, Bonn, Germany], *To*-Gal4 [[66] from B.  
664 Dauwalder, Houston, TX], *c929*-Gal4 [[46] from Paul H. Taghert], *yw*; UAS-  
665 *dilp6*, and *yw*; UAS-*dilp2*;+ [[23] from H. Stocker, Zürich, Switzerland]. Several  
666 UAS-*dilp1* lines were produced for a previous study [34] and two of them,  
667 UAS-*dilp1* (II) and UAS-*dilp1* (III), were used here. UAS-*dilp1*-RNAi flies were  
668 from Vienna *Drosophila* Resource Center (VDRC), Vienna, Austria. As  
669 controls we used *w*<sup>1118</sup> or *yw* obtained from BDSC, crossed to Gal4 and UAS  
670 lines. All flies (except *yw*; UAS-*dilp6*, and *yw*; UAS-*dilp2*;+) were backcrossed  
671 to *w*<sup>1118</sup> for at least 6 generations.

672 We used a double null mutation of *dilp1/dilp2* that was previously  
673 generated by homologous recombination and verified as described by Post et  
674 al. [34]. Also single *dilp1* and *dilp2* null mutants were employed. We refer to  
675 these three null mutants as *dilp1*, *dilp2* and *dilp1/dilp2* mutants for simplicity.  
676 As described earlier [34], these were obtained from BDSC and a residual *w*+  
677 marker was Cre excised followed by chromosomal exchange to remove *yw*  
678 markers on chromosomes 2 and X.

679 To generate a recombinant *dilp6;;dilp1* double mutant, the *dilp1* and  
680 *dilp6*<sup>68</sup> mutants [10] were used for crossing with a double balancer fly,  
681 4E10D/FM7,dfd;;Vno/TM3,dfd, obtained from Dr. Vasilios Tsarouhas  
682 (Stockholm University). The efficiency of the *dilp6;;dilp1* double mutant was  
683 validated by qPCR.

684

### 685 **Antisera and immunocytochemistry**

686 For immunolabeling, tissues from larvae or female adults were dissected in  
687 chilled 0.1 M phosphate buffered saline (PBS). They were then fixed for 4  
688 hours in ice-cold 4% paraformaldehyde (PFA) in PBS, and subsequently  
689 rinsed in PBS three times for 1 h. Incubation with primary antiserum was  
690 performed for 48 h at 4°C with gentle agitation. After rinse in PBS with 0.25%  
691 Triton-X 100 (PBS-Tx) four times, the tissues were incubated with secondary

692 antibody for 48 h at 4°C. After a thorough wash in PBS-Tx, tissues were  
693 mounted in 80% glycerol with 0.1 M PBS.

694 The following primary antisera were used: Rabbit or guinea pig  
695 antiserum to part of the C-peptide of DILP1 diluted 1:10000 [16]. Rabbit  
696 antisera to A-chains of DILP2 and DILP3 [67] and part of the C-peptide of  
697 DILP5 [68] all at a dilution of 1:2000, rabbit anti-AKH (1:1000) from M.R.  
698 Brown, Athens, GA, rabbit anti-pigment-dispersing hormone (1:3000) from H.  
699 Dirksen, Stockholm, Sweden [69], rabbit antiserum to cockroach leucokinin I  
700 (LK I) at 1:2000 [70], mouse anti-green fluorescent protein (GFP) at 1:000  
701 (RRID: AB\_221568, Invitrogen, Carlsbad, CA).

702 The following secondary antisera were used: goat anti-rabbit Alexa 546,  
703 goat anti-rabbit Alexa 488, and goat anti-mouse Alexa 488 (all from  
704 Invitrogen). Cy3-tagged goat anti-guinea pig antiserum (Jackson  
705 ImmunoResearch, West Grove, PA). All were used at a dilution of 1:1000.

706

707

### **Image analysis**

708 Images were captured with a Zeiss LSM 780 confocal microscope (Jena,  
709 Germany) using 10x, 20x and 40x oil immersion objectives. The projections  
710 of z-stacks were processed using Fiji (<https://imagej.nih.gov/ij/>). The cell body  
711 outlines were extracted manually and the size and staining intensity were  
712 determined using ImageJ (<https://imagej.nih.gov/ij/>). The background intensity  
713 for all samples was recorded by randomly selecting three small regions near  
714 the cell body of interest. The final intensity value of the cell bodies was  
715 determined by subtracting the background intensity.

716 Images of pupae, adult flies and fly wings were captured with a Leica  
717 EZ4HD light microscope (Wetzlar, Germany). The size of the adult fly body  
718 and wings were determined using Fiji. The pupal volume ( $v$ ) was calculated  
719 using the equation  $v = 4/3 \pi (L/2) \times (l/2)^2$ , in which  $L$  = length and  $l$  = width  
720 [71]. Thorax length was measured from the posterior tip of the scutellum to  
721 the base of the most anterior point of the humeral bristle.

722

### **Pupariation time, egg to pupae viability and adult body weight**

723 To determine time to pupariation, 6-7 day old adult females were crossed in  
724 the evening. The following morning, adult flies were transferred to vials with  
725

726 fresh food on which they were allowed to lay eggs for four hours. Two hours  
727 after the initiation of egg laying was considered time “0”, and thereafter the  
728 number of pupae was monitored at 6 or 12-hour intervals. To investigate the  
729 viability of egg to pupae formation, one pair of 6-7 day old adult flies was  
730 allowed to lay eggs for 24 hours after which the total number of eggs was  
731 counted. Subsequently, the total number of pupae was counted and the  
732 viability of egg to pupae was determined as pupa number/egg number ×  
733 100%. The body weight (wet weight) of single adult flies was determined  
734 using a Mettler Toledo MT5 microbalance (Columbus, USA). The number of  
735 eggs of stage 10-14 in ovaries was counted in 3-day-old flies.

736

737

#### **Starvation survival assay**

738 Newly hatched and mated 6-7 day old adults were used for starvation  
739 resistance experiments. For newly hatched flies, we collected virgin flies every  
740 4 hours, to be used for starvation experiments. The flies were kept in vials  
741 containing 5 ml of 0.5% aqueous agarose (A2929, Sigma-Aldrich). The  
742 number of dead flies was counted at least every 12 hours until all the flies  
743 were dead. At least 110 flies from 3 replicates were used for the analysis.

744

745

#### **Capillary feeding (CAFE) assay**

746 Food intake was measured using a slightly modified capillary feeding (CAFE)  
747 assay following Ja et al. [72]. In brief, female flies were placed into 1.5-ml  
748 Eppendorf micro centrifuge tubes with an inserted capillary tube (5 µl, Sigma)  
749 containing 5% sucrose, 2% yeast extract and 0.1% propionic acid. To  
750 estimate evaporation, three food-filled capillaries were inserted in identical  
751 tubes without flies. The final food intake was determined by calculating the  
752 decrease in food level minus the average decrease in the three control  
753 capillaries. Food consumption was measured daily and calculated  
754 cumulatively over four consecutive days. For this assay we used 8-10 flies in  
755 each of three biological replicates.

756

757

#### **Quantitative real-time PCR (qPCR)**

758 Total RNA was extracted from whole bodies of middle or late pupal stages of  
759 *Drosophila* by using Trizol-chloroform (Sigma-Aldrich). Quality and

760 concentration of the RNA were determined with a NanoDrop 2000  
761 spectrophotometer (Thermo Scientific). The concentration of the RNA was  
762 adjusted to 400 ng/ $\mu$ l. Totally 2ug RNA was used for cDNA synthesis. The  
763 cDNA syntheses were performed by using random hexamer primer (Thermo  
764 Scientific) and RevertAid reverse transcriptase (Thermo Scientific). The cDNA  
765 products were then diluted 10 times and applied for qPCR using a  
766 StepOnePlus<sup>TM</sup> instrument (Applied Biosystem, USA) and SensiFAST SYBR  
767 Hi-ROX Kit (Bioline) followed the protocol from the manufacturer. The mRNA  
768 abundance was normalized to ribosomal protein (rp49) levels in the same  
769 samples. Relative expression values were determined by the  $2^{-\Delta\Delta CT}$  method  
770 [73]. The sequences of primers used for qPCR were those used previously  
771 [16,34,74]:

772 dilp1 F: CGGAAACCACAAACTCTGCG  
773 dilp1 R :CCCAGCAAGCTTTCACGTTT  
774 dilp2 F: AGCAAGCCTTTGTCCTTCATCTC  
775 dilp2 R: ACACCATACTCAGCACCTCGTTG;  
776 dilp6 F: CCCTTGGCGATGTATTTCCCAACA  
777 dilp6 R: CCGACTTGCAGCACAAATCGGTTA  
778 akh F: GCGAAGTCCTCATTGCAGCCGT  
779 akh R: CCAATCCGGCGAGAAGGTCAATTGA  
780 *tobi* F: CCACCAAGCGAGACATTTACC  
781 *tobi* R: GAGCGGCGTAGTCCATCAC  
782 *bmm* F: GGT CCC TTC AGT CCC TCC TT  
783 *bmm* R: GCT TGT GAG CAT CGT CTG GT  
784 rp49 F: ATCGGTTACGGATCGAACAA  
785 rp49 R: GACAATCTCCTTGCGCTTCT

786

787

### **Metabolite quantification**

788 Glycogen and triacyl glyceride (TAG) levels were assayed as previously  
789 described [34,75,76]. For glycogen assays, 5-6 adult female flies per sample  
790 were homogenized in PBS and quantified using the Infinity Glucose  
791 Hexokinase reagent by spectrophotometry. For TAG assays, 5-6 adult female  
792 flies per sample were homogenized in PBS + 0.05% TBS-T and quantified  
793 using the Infinity Triglycerides reagent by spectrophotometry. The fly lysate



794 protein levels were determined by BCA assay (Thermo Fisher) and metabolite  
795 levels were normalized to protein level.

796 To measure the amount of TAG during late pupal stages, 6 replicates  
797 with 4 pupae in each were collected and then homogenized in PBS + 0.05%  
798 Triton-X 100 with a tissuelyser II from Qiagen. The TAG levels was  
799 determined with a Liquick Cor-TG diagnostic kit (Cormay, Poland) using a  
800 linear regression coefficient from a standard curve made with 2.2  $\mu\text{g}/\mu\text{l}$  TAG  
801 standard (Cormay, Poland). Absorbance of samples was measured at 550 nm  
802 with a micro-plate reader (Thermo scientific). Data are expressed as  
803 micrograms of TAG related to protein levels. Protein levels were determined  
804 using a Bradford assay according to Diop et al. [77].

805

806

### **Dynamic injection respirometry**

807 Carbon dioxide ( $\text{CO}_2$ ) production and oxygen ( $\text{O}_2$ ) consumption of individual  
808 pupae of both sexes were measured during pupal development at 25°C to  
809 assess metabolic rate (MR) as described previously [49]. Pupae were placed  
810 in 1 ml syringes (i.e. respirometry chambers) that were filled with air scrubbed  
811 of  $\text{CO}_2$  with ascarite (Acros Organics, USA) that then passed through filtered  
812 acidified water (pH < 4.5, checked weekly), closed with three-way luer valves,  
813 and kept for roughly 24 hours at 25°C with 12:12 Light:Dark cycle. An empty  
814 syringe served as control.  $\text{CO}_2$  production was measured using a Sable  
815 Systems (Las Vegas, NV, USA) differential respirometry setup. Two  
816 independent lines of outdoor air scrubbed of  $\text{H}_2\text{O}$  and  $\text{CO}_2$ , using drierite (WA  
817 Hammond Drierite, USA) and ascarite scrubbers respectively, were pushed at  
818 a steady rate of 150  $\text{ml min}^{-1}$  using a SS-4 pump (Sable Systems) and two  
819 separate mass flow controllers (840 Series; Sierra Instruments Inc, California,  
820 USA). The syringes containing pupae were placed after the mass valve  
821 controllers in the first line (sample) and 0.45 ml pushed into the airflow. The  
822 push rate was recorded through a second flowmeter downstream of the  
823 syringe and approximated a flow rate of 162  $\text{ml min}^{-1}$  downstream of the  
824 syringe. The line was then scrubbed of  $\text{H}_2\text{O}$  with drierite and entered the  
825 sample line of a Li-7000  $\text{CO}_2$  analyser (LiCor, Lincoln, NE, USA). The second  
826 line (reference) proceeded the same way, mimicking the exact length of the  
827 sample line (including an empty measurement chamber), entering the

828 reference line of the CO<sub>2</sub> analyser. The lines then proceeded through a  
829 second set of ascarite CO<sub>2</sub> scrubbers and entered an Oxzilla FC-2 O<sub>2</sub>  
830 analyser (Sable Systems) after which air was ejected. Preliminary  
831 measurements were performed to ensure stability of flow rate through either  
832 channel by measuring the flow rate of air ejected from the O<sub>2</sub> analyser. After  
833 the measurement pupae were weighed using a Mettler Toledo MT5  
834 microbalance (Columbus, USA) and left at 25°C with 12:12 Light:Dark cycle  
835 until adult eclosion, at which point they were sexed.

836 Differential CO<sub>2</sub> and O<sub>2</sub> were calculated by subtracting the output of the  
837 reference line from the output of the sample line. For all measurements  
838 sampling rate was 1 Hz. In the program Expedata (version 1.9.10) the raw  
839 output was baseline corrected against the reference line value, fractioned and  
840 multiplied with flow rate to yield CO<sub>2</sub> and O<sub>2</sub> in ml min<sup>-1</sup> [78]. The values were  
841 then corrected by subtracting the readings from the empty control syringe  
842 from the sample values. MR was calculated by first integrating the fractioned  
843 CO<sub>2</sub> and O<sub>2</sub> (ml min<sup>-1</sup>) values against time to yield CO<sub>2</sub> and O<sub>2</sub> in ml produced  
844 while pupae were in the syringes. Next VCO<sub>2</sub> and VO<sub>2</sub> were corrected by  
845 accounting for the fraction of air that was still left in the syringe and the time  
846 spent in the syringe using the formula (only calculation for VCO<sub>2</sub> is shown)  
847  $VCO_2 = (CO_2 \times (0.6 / 0.45)) / \text{hours in syringe}$  (Lighton, 2008). Then the  
848 respiratory quotient (RQ) was calculated as  $RQ = VCO_2 / VO_2$ . RQ values  
849 provide an estimate on what energy source is being catabolized to fuel  
850 metabolism [48]. MR (in Watts = Joules s<sup>-1</sup>) was converted from VO<sub>2</sub> using the  
851 formula  $MR = (VO_2 \times (16 + (5.164 \times RQ))) / (60 \times 60)$  (Lighton 2008) and  
852 finally divided by body weight in mg to yield MR mg<sup>-1</sup>.

853 In the present study we monitored single identified individuals throughout  
854 pupal development, and sexed them after eclosion. For the vast majority  
855 eclosion was successful and therefore we could use the true weight of the  
856 individual for the calculation above. However, for individuals that failed to  
857 eclose properly we instead used the average weight for that sex and  
858 treatment to calculate MR.

859

860

861

862 **Statistical analysis**

863 All results are presented as means  $\pm$  SEM. We first investigated normality of  
864 data using Shapiro-Wilk's normality test, then used one-way analysis of  
865 variance (ANOVA) or Student's t-test, followed by Tukey's multiple  
866 comparisons test. Lifespan data were subjected to survival analysis (Log rank  
867 tests with Mantel-Cox post-test) and presented as survival curves.

868 For the respirometry data we used the natural logarithm of MR mg<sup>-1</sup>  
869 due to deviations from normality. A factorial two-way ANOVA was used with  
870 MR mg<sup>-1</sup> or RQ as dependent variable, and sex and treatment as factorial  
871 explanatory variables. Non-significant interactions and main effects were  
872 removed from final models [79]. The respirometry data were analyzed with the  
873 IBM SPSS statistics 23.0 (IBM SPSS Inc., Chicago, IL, USA) statistical  
874 software package. Prism GraphPad version 6.00 (La Jolla, CA, USA) was  
875 used for generating all the graphs.

876

877 **Acknowledgements**

878 We thank the Bloomington *Drosophila* Stock Center (Bloomington, IN), the  
879 Vienna *Drosophila* Resource Center (Vienna, Austria) and Drs. M.J. Pankratz,  
880 B. Dauwalder, V. Monnier, P.H. Taghert, V. Tsarouhas and H. Stocker for flies,  
881 and Dr. M. R. Brown for AKH antiserum.

882

883 **References**

- 884 1. Antonova Y, Arik AJ, Moore W, Riehle MR, Brown MR (2012) Insulin-like peptides:  
885 Structure, Signaling, and Function. In: Gilbert LI, editor. Insect Endocrinology.  
886 New York: Elsevier/Academic Press. pp. 63-92.
- 887 2. Barbieri M, Bonafe M, Franceschi C, Paolisso G (2003) Insulin/IGF-I-signaling  
888 pathway: an evolutionarily conserved mechanism of longevity from yeast to  
889 humans. *Am J Physiol Endocrinol Metab* 285: E1064-1071.
- 890 3. Kaletsky R, Murphy CT (2010) The role of insulin/IGF-like signaling in *C. elegans*  
891 longevity and aging. *Disease models & mechanisms* 3: 415-419.
- 892 4. Garofalo RS (2002) Genetic analysis of insulin signaling in *Drosophila*. *Trends*  
893 *Endocrinol Metab* 13: 156-162.
- 894 5. Edgar BA (2006) How flies get their size: genetics meets physiology. *Nat Rev*  
895 *Genet* 7: 907-916.
- 896 6. Froesch ER, Zapf J (1985) Insulin-like growth factors and insulin: comparative  
897 aspects. *Diabetologia* 28: 485-493.
- 898 7. Baker J, Liu JP, Robertson EJ, Efstratiadis A (1993) Role of Insulin-Like Growth-  
899 Factors in Embryonic and Postnatal-Growth. *Cell* 75: 73-82.
- 900 8. Tokarz VL, MacDonald PE, Klip A (2018) The cell biology of systemic insulin  
901 function. *J Cell Biol* 217: 2273-2289.

- 902 9. Watanabe Y, Miyamoto Y, Matsuda T, Tanaka M (2011) Relaxin-3/INSL7  
903 regulates the stress-response system in the rat hypothalamus. *Journal of*  
904 *molecular neuroscience* : MN 43: 169-174.
- 905 10. Grönke S, Clarke DF, Broughton S, Andrews TD, Partridge L (2010) Molecular  
906 evolution and functional characterization of *Drosophila* insulin-like peptides.  
907 *PLoS Genet* 6: e1000857.
- 908 11. Oldham S, Hafen E (2003) Insulin/IGF and target of rapamycin signaling: a TOR  
909 de force in growth control. *Trends Cell Biol* 13: 79-85.
- 910 12. Brogiolo W, Stocker H, Ikeya T, Rintelen F, Fernandez R, et al. (2001) An  
911 evolutionarily conserved function of the *Drosophila* insulin receptor and  
912 insulin-like peptides in growth control. *Curr Biol* 11: 213-221.
- 913 13. Garelli A, Gontijo AM, Miguela V, Caparros E, Dominguez M (2012) Imaginal  
914 discs secrete insulin-like peptide 8 to mediate plasticity of growth and  
915 maturation. *Science* 336: 579-582.
- 916 14. Colombani J, Andersen DS, Leopold P (2012) Secreted peptide Dilp8  
917 coordinates *Drosophila* tissue growth with developmental timing. *Science* 336:  
918 582-585.
- 919 15. Slaidina M, Delanoue R, Grönke S, Partridge L, Leopold P (2009) A *Drosophila*  
920 insulin-like peptide promotes growth during nonfeeding states. *Dev Cell* 17:  
921 874-884.
- 922 16. Liu Y, Liao S, Veenstra JA, Nässel DR (2016) *Drosophila* insulin-like peptide 1  
923 (DILP1) is transiently expressed during non-feeding stages and reproductive  
924 dormancy. *Sci Rep* 6: 26620.
- 925 17. Miguel-Aliaga I, Thor S, Gould AP (2008) Postmitotic specification of *Drosophila*  
926 insulineric neurons from pioneer neurons. *PLoS Biol* 6: e58.
- 927 18. Rulifson EJ, Kim SK, Nusse R (2002) Ablation of insulin-producing neurons in  
928 flies: growth and diabetic phenotypes. *Science* 296: 1118-1120.
- 929 19. Lee KS, Kwon OY, Lee JH, Kwon K, Min KJ, et al. (2008) *Drosophila* short  
930 neuropeptide F signalling regulates growth by ERK-mediated insulin  
931 signalling. *Nat Cell Biol* 10: 468-475.
- 932 20. Cao C, Brown MR (2001) Localization of an insulin-like peptide in brains of two  
933 flies. *Cell Tissue Res* 304: 317-321.
- 934 21. Broughton SJ, Piper MD, Ikeya T, Bass TM, Jacobson J, et al. (2005) Longer  
935 lifespan, altered metabolism, and stress resistance in *Drosophila* from  
936 ablation of cells making insulin-like ligands. *Proc Natl Acad Sci U S A* 102:  
937 3105-3110.
- 938 22. Okamoto N, Yamanaka N, Satake H, Saegusa H, Kataoka H, et al. (2009) An  
939 ecdysteroid-inducible insulin-like growth factor-like peptide regulates adult  
940 development of the silkworm *Bombyx mori*. *FEBS J* 276: 1221-1232.
- 941 23. Ikeya T, Galic M, Belawat P, Nairz K, Hafen E (2002) Nutrient-dependent  
942 expression of insulin-like peptides from neuroendocrine cells in the CNS  
943 contributes to growth regulation in *Drosophila*. *Curr Biol* 12: 1293-1300.
- 944 24. Sato-Miyata Y, Muramatsu K, Funakoshi M, Tsuda M, Aigaki T (2014)  
945 Overexpression of dilp2 causes nutrient-dependent semi-lethality in  
946 *Drosophila*. *Frontiers in Physiology* 5: 147.
- 947 25. Zhang H, Liu J, Li CR, Momen B, Kohanski RA, et al. (2009) Deletion of  
948 *Drosophila* insulin-like peptides causes growth defects and metabolic  
949 abnormalities. *Proc Natl Acad Sci U S A* 106: 19617-19622.
- 950 26. McBrayer Z, Ono H, Shimell M, Parvy JP, Beckstead RB, et al. (2007)  
951 Prothoracicotrophic hormone regulates developmental timing and body size in  
952 *Drosophila*. *Dev Cell* 13: 857-871.
- 953 27. Walkiewicz MA, Stern M (2009) Increased insulin/insulin growth factor signaling  
954 advances the onset of metamorphosis in *Drosophila*. *PLoS One* 4: e5072.
- 955 28. Mirth CK, Riddiford LM (2007) Size assessment and growth control: how adult  
956 size is determined in insects. *Bioessays* 29: 344-355.

- 957 29. Rewitz KF, Yamanaka N, O'Connor MB (2013) Developmental Checkpoints and  
958 Feedback Circuits Time Insect Maturation. *Curr Top Dev Biol* 103: 1-33.
- 959 30. Yamanaka N, Rewitz KF, O'Connor MB (2013) Ecdysone Control of  
960 Developmental Transitions: Lessons from *Drosophila* Research. *Annual*  
961 *Review of Entomology*, Vol 58 58: 497-516.
- 962 31. Grönke S, Muller G, Hirsch J, Fellert S, Andreou A, et al. (2007) Dual lipolytic  
963 control of body fat storage and mobilization in *Drosophila*. *PLoS Biol* 5: e137.
- 964 32. Van der Horst DJ, Van Marrewijk WJ, Diederer JH (2001) Adipokinetic hormones  
965 of insect: release, signal transduction, and responses. *Int Rev Cytol* 211: 179-  
966 240.
- 967 33. Patel RT, Soulages JL, Hariharasundaram B, Arrese EL (2005) Activation of the  
968 lipid droplet controls the rate of lipolysis of triglycerides in the insect fat body.  
969 *J Biol Chem* 280: 22624-22631.
- 970 34. Post S, Liao S, Yamamoto R, Veenstra JA, Nässel DR, et al. (2019) *Drosophila*  
971 insulin-like peptide *dilp1* increases lifespan and glucagon-like Akh expression  
972 epistatic to *dilp2*. *Aging Cell* 18: e12863.
- 973 35. Sondergaard L (1993) Homology between the Mammalian Liver and the  
974 *Drosophila* Fat-Body. *Trends Genetics* 9: 193-193.
- 975 36. Baker KD, Thummel CS (2007) Diabetic larvae and obese flies - emerging  
976 studies of metabolism in *Drosophila*. *Cell Metab* 6: 257-266.
- 977 37. Li S, Yu X, Feng Q (2019) Fat Body Biology in the Last Decade. *Annu Rev*  
978 *Entomol* 64: 315-333.
- 979 38. Okamoto N, Yamanaka N, Yagi Y, Nishida Y, Kataoka H, et al. (2009) A fat body-  
980 derived IGF-like peptide regulates postfeeding growth in *Drosophila*. *Dev Cell*  
981 17: 885-891.
- 982 39. Colombani J, Raisin S, Pantalacci S, Radimerski T, Montagne J, et al. (2003) A  
983 nutrient sensor mechanism controls *Drosophila* growth. *Cell* 114: 739-749.
- 984 40. Padmanabha D, Baker KD (2014) *Drosophila* gains traction as a repurposed tool  
985 to investigate metabolism. *Trends Endocrinol Metabol* 25: 518-527.
- 986 41. Tennessen JM, Thummel CS (2011) Coordinating Growth and Maturation -  
987 Insights from *Drosophila*. *Current Biology* 21: R750-R757.
- 988 42. Helmstadter M, Huber TB, Hermle T (2017) Using the *Drosophila* Nephrocyte to  
989 Model Podocyte Function and Disease. *Frontiers in Pediatrics* 5.
- 990 43. Park D, Veenstra JA, Park JH, Taghert PH (2008) Mapping peptidergic cells in  
991 *Drosophila*: where DIMM fits in. *PLoS ONE* 3: e1896.
- 992 44. Luo J, Liu Y, Nässel DR (2013) Insulin/IGF-regulated size scaling of  
993 neuroendocrine cells expressing the bHLH transcription factor Dimmed in  
994 *Drosophila*. *PLoS genetics* 9: e1004052.
- 995 45. Liu Y, Luo J, Nässel DR (2016) The *Drosophila* Transcription Factor Dimmed  
996 Affects Neuronal Growth and Differentiation in Multiple Ways Depending on  
997 Neuron Type and Developmental Stage. *Front Molec Neurosci* 9:97.
- 998 46. Hewes RS, Park D, Gauthier SA, Schaefer AM, Taghert PH (2003) The bHLH  
999 protein Dimmed controls neuroendocrine cell differentiation in *Drosophila*.  
1000 *Development* 130: 1771-1781.
- 1001 47. Merkey A, Wong CK, Hoshizaki DK, Gibbs AG (2011) Energetics of  
1002 metamorphosis in *Drosophila melanogaster*. *J Insect Physiol* 57: 1437-1445.
- 1003 48. Schmidt-Nielsen K (1991) *Animal Physiology*. Cambridge: Cambridge University  
1004 Press.
- 1005 49. Lehmann P, Pruischer P, Posledovich D, Carlsson MA, Käckelä R, et al. (2016)  
1006 Energy and lipid metabolism during direct and diapause development in a  
1007 pierid butterfly. *J Exp Biol* 219: 3049-3060.
- 1008 50. Arrese EL, Soulages JL (2010) Insect fat body: energy, metabolism, and  
1009 regulation. *Annu Rev Entomol* 55: 207-225.

- 1010 51. Galikova M, Diesner M, Klepsatel P, Hehlert P, Xu Y, et al. (2015) Energy  
1011 Homeostasis Control in *Drosophila* Adipokinetic Hormone Mutants. *Genetics*  
1012 201: 665-683.
- 1013 52. Grönke S, Mildner A, Fellert S, Tennagels N, Petry S, et al. (2005) Brummer  
1014 lipase is an evolutionary conserved fat storage regulator in *Drosophila*. *Cell*  
1015 *Metabol* 1: 323-330.
- 1016 53. Buch S, Melcher C, Bauer M, Katzenberger J, Pankratz MJ (2008) Opposing  
1017 effects of dietary protein and sugar regulate a transcriptional target of  
1018 *Drosophila* insulin-like peptide signaling. *Cell Metab* 7: 321-332.
- 1019 54. Aguila JR, Suszko J, Gibbs AG, Hoshizaki DK (2007) The role of larval fat cells in  
1020 adult *Drosophila melanogaster*. *J Exp Biol* 210: 956-963.
- 1021 55. Hwangbo DS, Gershman B, Tu MP, Palmer M, Tatar M (2004) *Drosophila*  
1022 dFOXO controls lifespan and regulates insulin signalling in brain and fat body.  
1023 *Nature* 429: 562-566.
- 1024 56. Slack C, Werz C, Wieser D, Alic N, Foley A, et al. (2010) Regulation of lifespan,  
1025 metabolism, and stress responses by the *Drosophila* SH2B protein, Lnk.  
1026 *PLoS Genet* 6: e1000881.
- 1027 57. Lee KS, You KH, Choo JK, Han YM, Yu K (2004) *Drosophila* short neuropeptide  
1028 F regulates food intake and body size. *J Biol Chem* 279: 50781-50789.
- 1029 58. Gäde G, Auerswald L (2003) Mode of action of neuropeptides from the  
1030 adipokinetic hormone family. *Gen Comp Endocrinol* 132: 10-20.
- 1031 59. Waterson MJ, Chung BY, Harvanek ZM, Ostojic I, Alcedo J, et al. (2014) Water  
1032 sensor ppk28 modulates *Drosophila* lifespan and physiology through AKH  
1033 signaling. *Proceedings of the National Academy of Sciences of the United*  
1034 *States of America* 111: 8137-8142.
- 1035 60. Zheng H, Yang X, Xi Y (2016) Fat body remodeling and homeostasis control in  
1036 *Drosophila*. *Life Sciences* 167: 22-31.
- 1037 61. Brown JB, Boley N, Eisman R, May GE, Stoiber MH, et al. (2014) Diversity and  
1038 dynamics of the *Drosophila* transcriptome. *Nature* 512: 393.
- 1039 62. Nässel DR, Vanden Broeck J (2016) Insulin/IGF signaling in *Drosophila* and other  
1040 insects: factors that regulate production, release and post-release action of  
1041 the insulin-like peptides. *Cell Mol Life Sci* 73: 271-290
- 1042 63. Kubrak OI, Kucerova L, Theopold U, Nässel DR (2014) The Sleeping Beauty:  
1043 How Reproductive Diapause Affects Hormone Signaling, Metabolism,  
1044 Immune Response and Somatic Maintenance in *Drosophila melanogaster*.  
1045 *PLoS ONE* 9: e113051.
- 1046 64. O'Brien DM, Min K-J, Larsen T, Tatar M (2008) Use of stable isotopes to examine  
1047 how dietary restriction extends *Drosophila* lifespan. *Current Biology* 18: R155-  
1048 R156.
- 1049 65. Zinke I, Kirchner C, Chao LC, Tetzlaff MT, Pankratz MJ (1999) Suppression of  
1050 food intake and growth by amino acids in *Drosophila*: the role of pumppless, a  
1051 fat body expressed gene with homology to vertebrate glycine cleavage  
1052 system. *Development* 126: 5275-5284.
- 1053 66. Dauwalder B, Tsujimoto S, Moss J, Mattox W (2002) The *Drosophila* takeout  
1054 gene is regulated by the somatic sex-determination pathway and affects male  
1055 courtship behavior. *Genes Dev* 16: 2879-2892.
- 1056 67. Veenstra JA, Agricola HJ, Sellami A (2008) Regulatory peptides in fruit fly midgut.  
1057 *Cell Tissue Res* 334: 499-516.
- 1058 68. Söderberg JA, Birse RT, Nässel DR (2011) Insulin production and signaling in  
1059 renal tubules of *Drosophila* is under control of tachykinin-related peptide and  
1060 regulates stress resistance. *PLoS ONE* 6: e19866.
- 1061 69. Dircksen H, Zahnow CA, Gaus G, Keller R, Rao KR, et al. (1987) The  
1062 ultrastructure of nerve endings containing pigmentdispersing hormone (PDH)  
1063 in crustacean sinus glands: identification by an antiserum against synthetic  
1064 PDH. *Cell Tissue Res* 250: 377-387.

- 1065 70. Nässel DR, Cantera R, Karlsson A (1992) Neurons in the cockroach nervous  
1066 system reacting with antisera to the neuropeptide leucokinin I. *J Comp Neurol*  
1067 322: 45-67.
- 1068 71. Agrawal N, Delanoue R, Mauri A, Basco D, Pasco M, et al. (2016) The  
1069 *Drosophila* TNF Eiger Is an Adipokine that Acts on Insulin-Producing Cells to  
1070 Mediate Nutrient Response. *Cell Metabolism* 23: 675-684.
- 1071 72. Ja WW, Carvalho GB, Mak EM, de la Rosa NN, Fang AY, et al. (2007)  
1072 Prandiology of *Drosophila* and the CAFE assay. *Proc Natl Acad Sci USA* 104:  
1073 8253-8256.
- 1074 73. Livak KJ, Schmittgen TD (2001) Analysis of relative gene expression data using  
1075 real-time quantitative PCR and the 2(-Delta Delta C(T)) Method. *Methods* 25:  
1076 402-408.
- 1077 74. Kubrak OI, Lushchak OV, Zandawala M, Nässel DR (2016) Systemic corazonin  
1078 signalling modulates stress responses and metabolism in *Drosophila*. *Open*  
1079 *Biology* 6.
- 1080 75. Bai H, Kang P, Tatar M (2012) *Drosophila* insulin-like peptide-6 (*dilp6*) expression  
1081 from fat body extends lifespan and represses secretion of *Drosophila* insulin-  
1082 like peptide-2 from the brain. *Aging Cell* 11: 978-985.
- 1083 76. Tennessen JM, Barry WE, Cox J, Thummel CS (2014) Methods for studying  
1084 metabolism in *Drosophila*. *Methods* 68: 105-115.
- 1085 77. Diop SB, Birse RT, Bodmer R (2017) High Fat Diet Feeding and High Throughput  
1086 Triacylglyceride Assay in *Drosophila Melanogaster*. *J Vis Exp*.
- 1087 78. Lighton JRB (2008) Measuring metabolic rates: A manual for scientists. New  
1088 York: Oxford University Press.
- 1089 79. Sokal RR, Rohlf FJ (2003) Biometry, the principles and practice of statistics in  
1090 biological research: W.H. Freeman and Company.
- 1091
- 1092

## Figure legends

1093

1094 **Fig. 1.** *dilp1* mutant flies display reduced body weight, but are not smaller. **A.**  
1095 Expression profile of *dilp1*/DILP1 in *Drosophila*. Note that expression of  
1096 transcript and peptide coincides with the non-feeding pupal stage and the first  
1097 days of adult life when food intake is reduced (especially day one). It also  
1098 times with the onset of the second and third ecdysone (*Ecd*) surges in the  
1099 early pupa (earlier ecdysone peaks are not shown). E, embryo. **B.** Body  
1100 weight of female flies 1 day and 6-7 days after adult eclosion. *dilp1* mutant  
1101 flies display reduced body weight when 1 d old, but gain substantially the first  
1102 week. Also *dilp2* mutants weigh less, but do not gain much weight first week.  
1103 The double mutants are not significantly affected compared to controls at 1 d,  
1104 but after 6-7 d both *dilp2* and double mutants weigh less than controls and  
1105 *dilp1* mutants. Data are presented as medians  $\pm$  range,  $n = 25-30$  flies for  
1106 each genotype from three independent replicates (\* $p < 0.05$ , \*\* $p < 0.01$ , \*\*\* $p <$   
1107  $0.001$ , two-way ANOVA followed by Tukey's test). **C.** In male flies the three  
1108 mutants display weights similar to controls and controls lose weight the first

1109 week. Data are presented as medians  $\pm$  range,  $n = 18\text{--}30$  flies for each  
1110 genotype from three independent replicates (\*\* $p < 0.01$ , two-way ANOVA  
1111 followed with Tukey's test). **D.** Wing area was used as a proxy for organismal  
1112 growth. The three mutants did not display altered wing size. Data are  
1113 presented as medians  $\pm$  range,  $n = 16\text{--}23$  flies for each genotype from three  
1114 independent replicates (One-way ANOVA followed with Tukey's test). **E.** Food  
1115 intake was monitored over four days in a CAFE assay. The first day the *dilp1*  
1116 mutant flies feed less than the other genotypes, whereas during the following  
1117 days there is no difference between genotypes. Data are presented as means  
1118  $\pm$  S.E.M,  $n = 20\text{--}30$  flies for each genotype from three independent replicates  
1119 (\*\* $p < 0.001$ , two-way ANOVA followed with Tukey's test). **F** and **G.** Body  
1120 weight of 7 d old flies that had been exposed to normal diet (N) or low protein  
1121 diet (L) during late larval stage. The female *dilp1* mutant flies displayed lower  
1122 body weight than controls after low protein. Data are presented as medians  $\pm$   
1123 range,  $n = 17\text{--}29$  flies for each genotype from three replicates (\* $p < 0.05$ , \*\*\* $p$   
1124  $< 0.001$ , one-way ANOVA followed by Tukey's test).

1125  
1126 **Fig. 2.** Overexpression of *dilp1* affects growth during pupal stage. **A.**  
1127 Expression of *dilp1* in insulin-producing cells (IPCs) with *dilp2*-Gal4 driver  
1128 increases body weight of 6-7 d adult flies. Data are presented as means  $\pm$   
1129 S.E.M,  $n = 14\text{--}23$  flies for each genotype from three independent replicates  
1130 (\* $p < 0.05$ , one-way ANOVA followed by Tukey's test). **B.** Overexpression of  
1131 *dilp1* in fat body (*ppl*-Gal4) or neuroendocrine cells (*c929*-Gal4) does not  
1132 affect time to pupariation (larval development). Data are presented as means  
1133  $\pm$  S.E.M,  $n = 138\text{--}147$  flies for each genotype from three independent  
1134 replicates (\* $p < 0.05$ , as assessed by Log-rank (Mantel-Cox) test). **C.**  
1135 Overexpression of *dilp1* using *ppl*-Gal4 or *c929*-Gal4 does not affect pupal  
1136 volume (proxy for larval growth). Also *dilp6* overexpression has no effect,  
1137 whereas *dilp2* expression triggers a significant increase in pupal volume. Data  
1138 are presented as means  $\pm$  S.E.M,  $n = 15\text{--}32$  flies for each genotype from  
1139 three independent replicates. (\*\* $p < 0.001$ , one-way ANOVA followed with  
1140 Tukey's test). **D** and **E.** Overexpression of *dilp1*, *dilp2* and *dilp6* in fat body all  
1141 lead to adult flies (one week old) with increased body weight both in males  
1142 and females. Data are presented as means  $\pm$  S.E.M,  $n = 24\text{--}30$  flies for each



1143 genotype from three independent replicates. Except for *ppl>dilp2*, 13 flies  
1144 were used (\**p* < 0.05, one-way ANOVA followed with Tukey's test). **F.** Also  
1145 one-day-old female flies weigh more than controls after *ppl>dilp1*, but not after  
1146 *dilp2>dilp1*. Knockdown of *dilp1* by *dilp2>dilp1*-RNAi lead to decreased body  
1147 weight. Data are presented as means  $\pm$  S.E.M, *n* = 20-27 flies for each  
1148 genotype from three independent replicates (\*\**p* < 0.01, \*\*\**p* < 0.001,  
1149 unpaired Students' t-test). **G.** Images of flies overexpressing *dilp1* in the fat  
1150 body and controls. **H** and **I.** Overexpression of *dilp1* in fat body results in flies  
1151 with increased wing area (H), and length of thorax (I) as proxies for  
1152 organismal growth. Data are presented as means  $\pm$  S.E.M, (\*\*\**p* < 0.001, one-  
1153 way ANOVA followed with Tukey's test); in H *n* = 17-24 flies and in I *n* = 9–17  
1154 flies from three independent replicates. **J.** Food intake (CAFE assay) is  
1155 increased over four days (cumulative data shown) in flies overexpressing  
1156 *dilp1* in fat body, but not in neuroendocrine cells (*c929 Gal4*). Data are  
1157 presented as means  $\pm$  S.E.M, *n* = 15–30 flies for each genotype from three  
1158 independent replicates (\**p* < 0.05, two-way ANOVA followed with Tukey's  
1159 test). **K.** Body weight of 6-7 d female flies is increased for all genotypes  
1160 compared to 1 d flies. The *ppl>dilp1* flies weigh more than controls at both  
1161 time points. Data are presented as medians  $\pm$  range, *n* = 23–27 flies for each  
1162 genotype from three independent replicates (\**p* < 0.05, \*\*\**p* < 0.001, two-way  
1163 ANOVA followed with Tukey's test).

1164

1165 **Fig. 3.** Metabolic rate trajectories and respiratory quotients (RQ) during pupal  
1166 development respond to *dilp1* and *dilp6* overexpression in the fat body. **A.**  
1167 Metabolic rate in *w<sup>1118</sup>* flies increased exponentially as a function of time. For  
1168 the ensuing overexpression analysis we studied the period 96-120 hours after  
1169 pupation. Data are presented as means  $\pm$  S.E.M, *n* = 10–15 flies from three  
1170 independent replicates. **B.** Metabolic rate was significantly elevated during  
1171 this period in *dilp1* and *dilp6* overexpression flies (*ppl-Gal4*) when compared  
1172 to *w<sup>1118</sup>* flies. Data are presented as means  $\pm$  S.E.M, *n* = 10–15 flies for each  
1173 genotype from three independent replicates (\*\*\**p* < 0.001, compared to *w<sup>1118</sup>*  
1174 flies, as assessed by two-way ANOVA followed with Tukey's test). Data are  
1175 from both males and females as no difference was found in the ANOVA for  
1176 sex. **C.** RQ, reflecting catabolic energy substrate, was significantly lower in

1177 the overexpression flies when compared to the control flies and indicates a  
1178 shift from mixed fuel catabolism (RQ = 0.7-0.8) to predominantly lipid  
1179 catabolism (RQ < 0.7). Data are presented as means  $\pm$  S.E.M, n = 10–15 flies  
1180 for each genotype from three independent replicates (\*\*p < 0.001, compared  
1181 to *w*<sup>1118</sup> flies, as assessed by one-way ANOVA followed with Tukey's test).  
1182 Data are from both males and females as no difference was found in the  
1183 ANOVA for sex. **D.** Four day old pupae (mixed male and female) were  
1184 weighed (wet weight) before extraction and TAG determination.  
1185 Overexpression of *dilp1* and *dilp6* both resulted in increased pupal weight. **E.**  
1186 Levels of TAG were measured in the pupae used for weighing in D.  
1187 Overexpression of each *dilp* resulted in decreased TAG levels. **F.** Glycogen  
1188 levels in 4 d old pupae (no significant changes). In **D-E** 12 replicates per  
1189 genotype with 4 pupae in each replicate (each data point represents 4 pupae),  
1190 in F 6 replicates per genotype with 4 pupae in each replicate (\*p < 0.05, \*\*p <  
1191 0.01, one-way ANOVA followed by Tukey's test).

1192

1193 **Fig. 4.** Contents in female flies of TAG, glycogen and glucose in mutants and  
1194 after ectopic *dilp1* expression. **A-C.** Contents of TAG and carbohydrates in  
1195 newborn mutants and controls. Note that for *dilp1* mutants only glycogen was  
1196 diminished, whereas for *dilp1-2* mutants all three compounds were  
1197 decreased. 8 replicates per genotype with 5-6 flies in each replicate (\*p <  
1198 0.05, \*\*\*p < 0.001, one-way ANOVA followed by Tukey's test). **D-F.** In 3 d old  
1199 flies glycogen was also reduced in *dilp1* mutants and double mutants. 8  
1200 replicates per genotype with 5-6 flies in each replicate (\*p < 0.05, \*\*\*p <  
1201 0.001, one-way ANOVA followed by Tukey's test). **G-I.** Overexpression of  
1202 *dilp1* in fat body (*ppl-Gal4*) only affected glycogen levels in newly hatched  
1203 flies. 6-8 replicates per genotype with 5-6 flies in each. Data are presented as  
1204 means  $\pm$  S.E.M, (\*p < 0.05, \*\*\*p < 0.001, compared to *w*<sup>1118</sup> flies, as assessed  
1205 by unpaired Students' t-test).

1206

1207 **Fig. 5.** Effects of mutated *dilp* genes on adult responses to starvation and  
1208 desiccation change in early adult life. **A.** In newly eclosed female flies *dilp1*  
1209 mutant flies display reduced survival during starvation (p<0.001) compared to  
1210 the other mutants and control. The double mutant is significantly more

1211 resistant ( $p < 0.001$ ).  $n = 109-147$  flies for each genotype from three  
1212 independent replicates. **B.** In three-day-old virgin female flies *dilp1-dilp2*  
1213 double mutants are the least starvation resistant ( $p < 0.001$ ) followed by the  
1214 *dilp1* mutants;  $n = 129-148$  flies for each genotype from three independent  
1215 replicates. **C.** Comparison between newly eclosed and 3 d flies exposed to  
1216 starvation. Both mutants and controls survive longer as newborn flies and  
1217 mutants perform worse than controls at each time point ( $p < 0.001$ ).  $n = 114-$   
1218  $144$  flies from three independent replicates. **D.** When exposed to desiccation  
1219 6-7 d old female double mutants are less resistant than the other genotypes  
1220 ( $p < 0.001$ ),  $n = 132-135$  flies from three independent replicates. Data are  
1221 presented in survival curves and the error bars show S.E.M, as assessed by  
1222 log-rank (Mantel–Cox) test].

1223

1224 **Fig. 6.** Over expression of *dilp1* in the fat body affects starvation resistance in  
1225 adult flies. **A** and **B.** In recently eclosed (A) and 6-7 d old (B) female flies  
1226 overexpression of *dilp1* (with *ppl-Gal4*) leads to a decrease in survival during  
1227 starvation  $n = 147-201$  flies per genotype from three independent replicates.  
1228 [\*\*\* $p < 0.001$ , as assessed by log-rank (Mantel–Cox) test]. **C** and **D.**  
1229 Expressing *dilp1* in IPCs with a *dilp2-Gal4* driver also diminishes starvation  
1230 survival in newborn flies  $n = 92-148$  flies from three independent replicates.  
1231 [\*\*\* $p < 0.001$ , as assessed by log-rank (Mantel–Cox) test], but not in 6-7 d  
1232 flies ( $n = 122-132$  flies from three independent replicates). **E** and **F.** Using  
1233 *c929* to drive *dilp1* in newborn and 6-7 d adult flies altered starvation  
1234 resistance only in the newborn ones [\*\*\* $p < 0.001$  as assessed by log-rank  
1235 (Mantel–Cox) test,  $n = 132-135$  flies per genotype from three independent  
1236 replicates.

1237

1238 **Fig. 7.** *Dilp1* overexpression affects food intake and fecundity. **A.** In CAFE  
1239 assay the *dilp1* overexpressing flies (6-7 d old females) display increased  
1240 food intake over 4 days (cumulative data shown), Data are presented as  
1241 means  $\pm$  S.E.M,  $n = 23-24$  flies from three independent replicates ( $*p < 0.05$ ,  
1242 two-way ANOVA followed by Tukey's test). **B.** Number of eggs laid in 24  
1243 hours by 6-7 day old flies. We analyzed 19-29 pairs of flies from 3 replicates,  
1244 (\*\* $p < 0.01$ , one-way ANOVA followed by Tukey's test). **C.** The egg to pupal

1245 viability is diminished in flies with *dilp1* expressed in fat body (*ppl-Gal4*) and  
1246 neuroendocrine cells [*c929-Gal4*, using two different UAS-*dilp1* (2 and 3)].  
1247 Data are presented as means  $\pm$  S.E.M, more than 276 eggs from 6 replicates  
1248 were monitored (\* $p < 0.05$ , unpaired Students' t-test). **D.** Number of eggs in  
1249 ovaries of 3 days old flies is not affected in *dilp1* mutants. 25-33 flies from 3  
1250 replicates were analyzed. **E.** *dilp1* mRNA is upregulated during starvation for  
1251 40 h in 10 d old adult *w<sup>1118</sup>* flies, compared to 12 d old flies fed normal food,  
1252 as monitored by qPCR. No effect was seen on *dilp2* and *dilp6* levels. Data are  
1253 presented as means  $\pm$  S.E.M, 3 replicates with 10 flies in each replicates were  
1254 monitored (\* $p < 0.05$ , unpaired Students' t-test). **F.** The level of adipokinetic  
1255 hormone (AKH) immunolabeling in 4-5 d old female flies increased after  
1256 overexpression of *dilp1* by *c929>dilp1*. 7-10 flies from 3 replicates, (\* $p < 0.05$ ,  
1257 unpaired Students' t-test).

1258

1259

### Supplemental material figures

1260

1261 **S1 Fig.** Evaluation of mutant efficiency. **A.** qPCR reveals that in stage P8-9  
1262 pupae the *dilp1* and *dilp1/dilp2* mutants display *dilp1* levels that are close to  
1263 zero, whereas in the *dilp6* mutant *dilp1* is upregulated and in *dilp2* mutant  
1264 slightly reduced. **B.** In the *dilp2* and *dilp1/dilp2* mutants *dilp2* levels are not  
1265 detectable. **C.** The *dilp6* levels are only affected in the *dilp6* mutants. Data are  
1266 presented as means  $\pm$  S.E.M,  $n = 6$  replicates for each genotype with 6 pupae  
1267 in each replicate. (\* $p < 0.05$ , compared with *w<sup>1118</sup>* flies, unpaired Students' t-  
1268 test). **D.** Using immunocytochemistry with antisera to DILP1-3 it can be shown  
1269 that labeling of IPCs in 1-week-old flies is not detectable for anti-DILP1 in  
1270 *dilp1* and double mutants and for DILP2 in *dilp2* and double mutants. DILP3 is  
1271 upregulated in *dilp2* mutants. **E-G.** Quantification of immunofluorescence  
1272 shows that DILP1 labeling is not affected in *dilp2* mutants (E), DILP2 is  
1273 increased in *dilp1* mutants (F) and DILP3 strongly increased only in *dilp2*  
1274 mutants (G). Data are presented as means  $\pm$  S.E.M,  $n = 9-12$  flies from 3  
1275 replicates. (\*\* $p < 0.01$ , \*\*\* $p < 0.001$ , compared with *w<sup>1118</sup>* flies, unpaired  
1276 Students' t-test).

1277

1278 **S2 Fig.** Recombinant *dilp1/dilp6* mutant flies display reduced body mass. **A.**  
1279 Transcripts of *dilp1* and *dilp6* in one-day-old *dilp1/dilp6* mutant flies. Data are  
1280 presented as means  $\pm$  S.E.M, n = 3 replicates for each genotype with 6 pupae  
1281 in each replicate. (\*\*p < 0.001, \*\*\*p < 0.0001, compared with *w*<sup>1118</sup> flies,  
1282 unpaired Students' t-test). **B.** Body weights are significantly reduced in single  
1283 mutants and recombinant double mutants, but no additive effect of the double  
1284 mutation was detected. (n = 11–16 flies per genotype from three replicates,  
1285 One-way ANOVA followed by Tukey's test).

1286

1287 **S3 Fig.** Verification of ectopic *dilp1* expression by DILP1 immunolabeling. **A.**  
1288 After *dilp2*-Gal4-driven *dilp1* expression strong DILP1 immunolabeling can be  
1289 detected in IPCs of 3<sup>rd</sup> instar larvae as well as 1 and 3 week old adults, but  
1290 not in controls (*dilp2*>*w*<sup>1118</sup>). **B.** Quantification of DILP1 immunofluorescence  
1291 in IPCs of one-week-old adults, using two different UAS-*dilp1* (2 and 3). Data  
1292 are presented as means  $\pm$  S.E.M, n = 5-7 flies from 3 replicates. (\*\*\*p < 0.001,  
1293 compared with control flies, unpaired Students' t-test). **C.** Using the c929  
1294 driver DILP1 immunolabeling can be detected in numerous neuroendocrine  
1295 cells in the CNS of larvae and brain of adults, but not in controls (*c929*>*w*<sup>1118</sup>).  
1296 **D.** Using two different fat body Gal4 drivers (*ppl* and *to*) DILP1  
1297 immunolabeling can be detected in adipocytes.

1298

1299 **S4 Fig.** Verification of ectopic *dilp1* expression by qPCR in stage P8-9 pupae.  
1300 **A.** Using the fat body Gal4 drivers *ppl* and *to* a drastic increase of *dilp1*  
1301 transcript was seen. **B.** The *dilp2* level was diminished after *ppl*-driven *dilp1*.  
1302 **C.** No significant effect was seen on *dilp6* levels after *dilp1* expression. **D-F.**  
1303 Driving *dilp1* in IPCs with *dilp2*-Gal4 drastically increases *dilp1*, but has no  
1304 effect on *dilp2* or *dilp6*. Data are presented as means  $\pm$  S.E.M, n = 5-6  
1305 replicates per genotype with 10 pupae in each replicate. (\*p < 0.05, \*\*p <  
1306 0.01, \*\*\*p < 0.01, compared with *w*<sup>1118</sup> flies, unpaired Students' t-test).

1307

1308 **S5 Fig.** Effects of ectopic *dilp1* expression on peptide levels of DILPs in one-  
1309 week-old adults. **A.** Expressing *dilp1* in IPCs (*dilp2*>*dilp1*) increases DILP2  
1310 immunolabeling and decreases DILP3. **B** and **C.** Quantification of  
1311 immunolabeling. Data are presented as means  $\pm$  S.E.M, n = 7-10 per

1312 genotype from 3 replicates. (\*\*p < 0.01, compared with w<sup>1118</sup> flies, unpaired  
1313 Students' t-test). **D.** Using the broader *c929-Gal4* to drive *dilp1* the DILP5  
1314 immunolabeling of IPCs increase. **E.** Quantification of DILP5 immunolabeling.  
1315 Data are presented as means ± S.E.M, n = 9-12 from 3 replicates. (\*\*p < 0.01,  
1316 compared with w<sup>1118</sup> flies, unpaired Students' t-test).

1317

1318 **S6 Fig.** Effects of ectopic *dilp1* expression on body weight and organismal  
1319 size. **A.** Expressing *dilp1* in the fat body (*ppl-Gal4*) of male flies leads to  
1320 increased weight compared to controls in both young and older flies.  
1321 However, in contrast to female flies, shown in Fig. 2K, there is no gain in  
1322 weight over the first 5-6 days as adults, rather a decrease. Data are  
1323 presented as medians ± range, n = 14–25 flies from three independent  
1324 replicates (\*p < 0.05, \*\*p < 0.01, \*\*\*p < 0.001, two-way ANOVA followed with  
1325 Tukey's test). **B.** Driving *dilp1* in IPCs with *dilp2-Gal4* in females increases the  
1326 weight compared to controls in older flies. Data are presented as medians ±  
1327 range, n = 14–23 flies from three independent replicates (\*p < 0.05, \*\*p <  
1328 0.01, two-way ANOVA followed with Tukey's test). **C.** Driving *dilp1* in IPCs  
1329 increases the weight of one-day-old and 6-7 day old male flies, compared to  
1330 both controls. Furthermore the younger flies weigh more than the older ones  
1331 for all genotypes. Data are presented as medians ± range, n = 14–24 flies per  
1332 genotype from three independent replicates (\*\*p < 0.01, \*\*\*p < 0.001, two-way  
1333 ANOVA followed with Tukey's test). **D** and **E.** Using *to-Gal4* the body masses  
1334 show the same patterns as with *ppl-Gal4* (Fig. 2K and **S5A Fig**), where body  
1335 masses increase after *dilp1* over expression, and in females there is an  
1336 additional weight gain over the first 5-6 days. The following days (13-14 d) no  
1337 additional increase is seen. Data are presented as medians ± range, n = 9–27  
1338 flies per genotype from three independent replicates (\*p < 0.05, \*\*p < 0.01,  
1339 \*\*\*p < 0.001, two-way ANOVA followed with Tukey's test). **F-H.** The *dilp1*  
1340 expression obtained with the *to-Gal4* does not result in a significant increase  
1341 in wing area, (n = 16–22 flies per genotype from three replicates, One-way  
1342 ANOVA followed with Tukey's test), whereas thorax length increased slightly  
1343 (n = 19-32 flies per genotype (\*p < 0.05 unpaired Students' t-test), but no  
1344 effect on pupal volume (n = 29 flies per genotype from three replicates, One-  
1345 way ANOVA followed with Tukey's test).

1346

1347 **S7 Fig.** Effects of *dilp1* expression on weight, wing area and food intake. **A**

1348 The body weight increased in male flies after ectopic *dilp1* expression with

1349 *c929-Gal4*, \*\*\*  $p < 0.001$ , data are presented as means  $\pm$  S.E.M,  $n = 16-29$

1350 flies per genotype from three independent replicates (One-way ANOVA

1351 followed with Tukey's test). **B.** The wing area is not affected by *c929-driven*

1352 *dilp1* expression. Data are presented as means  $\pm$  S.E.M,  $n = 15$  flies from

1353 three independent replicates (One-way ANOVA followed with Tukey's test). **C.**

1354 Driving *dilp1* with *dilp2-* and *c929-Gal4* does not affect food intake. Data are

1355 presented as means  $\pm$  S.E.M,  $n = 24$  flies from three independent replicates

1356 (two-way ANOVA followed with Tukey's test). dent replicates, as assessed by

1357 log-rank (Mantel–Cox) test.

1358

1359 **S8 Fig.** The brain and neuronal cell bodies grow after *dilp1* overexpression in

1360 neuroendocrine cells. **A-C.** Using the *c929-Gal4* line to drive *dilp1* in

1361 neuroendocrine cells leads to increased size of the cell bodies of DILP2

1362 immunolabeled insulin producing cells (A1-A3), PDF labeled I-LNV clock

1363 neurons (B1-B3) and abdominal leucokinin (LK) immunoreactive neurons,

1364 ABLK (C1-C3). **D.** The entire brain also increases in size in *c929>dilp1* flies.

1365 **E.** Expression of *dilp1* in IPCs with the *dilp2-Gal4* line is not sufficient to obtain

1366 an increase in size of IPCs. **F1-F3.** Expression of *dilp1* in the fat body (*pp1-*

1367 *Gal4*) increases the size of the I-LNV clock neurons and the entire brain (**G**).

1368 Data are presented as means  $\pm$  S.E.M,  $n = 8-10$  samples for each genotype

1369 from three independent replicates (\* $p < 0.05$ , \*\* $p < 0.01$ , \*\*\* $p < 0.001$ , as

1370 assessed by unpaired Students' t-test).

1371

1372 **S9 Fig.** Ectopic expression of *dilp1* in clock neurons or larval neuroendocrine

1373 cells does not affect cell size. **A-D.** Expression of *dilp1* with the clock neuron

1374 driver *pdf-Gal4* does not affect the size of the PDF-immunolabeled large LN<sub>v</sub>s

1375 quantified in B. The brain size is also not affected (C). However the PDF

1376 immunolabeling is strongly increased (D). Data are presented as means  $\pm$

1377 S.E.M,  $n = 8$  for each genotype from 3 replicates. (\*\* $p < 0.01$ , compared with

1378  $w^{1118}$  flies, unpaired Students' t-test). **E.** Ectopic expression of *dilp1* with the

1379 *c929-Gal4* line does not affect the size of leucokinin (LK)-immunolabeled

1380 neuronal cell bodies in the third instar larvae (quantified in F) or the size of the  
1381 larval CNS (G). Data are presented as means  $\pm$  S.E.M, n = 6-9 for each  
1382 genotype from 3 replicates.

1383

1384 **S10 Fig.** Ectopic expression of *dilp1* in glial cells with *repo*-Gal4 does not  
1385 affect growth of neuronal cell bodies. **A.** DILP1 immunolabeling appears in  
1386 cells after *Repo>dilp1*, but has no effect on the size of I-LNv clock neurons  
1387 labeled with anti-PDF (quantified in **B**). Data are presented as means  $\pm$   
1388 S.E.M, n = 9 for each genotype from 3 replicates.

1389

1390 **S11 Fig.** Overexpression and mutation of *dilps* have little effect on AKH  
1391 signaling as determined by qPCR. **A - J.** Transcripts of AKH (*Akh*), brummer  
1392 lipase (*bmm*) and the glucosidase target of brain insulin (*tobi*) were measured  
1393 by qPCR in different genotypes at two stages of pupal development: two day  
1394 old and 4 day old. For overexpression in fat body we used *ppl*- and *to*-Gal4  
1395 drivers. We analyzed 3 replicates with 6 pupae in each replicates (\*p < 0.05,  
1396 one-way ANOVA followed by Tukey's test). **K.** Glucose levels were  
1397 determined in 4 d pupae; 6 replicates per genotype with 4 pupae in each  
1398 replicate (No significant differences; analysis by one-way ANOVA followed by  
1399 Tukey's test). This panel is associated with Fig. 3D – F.

1400

1401 **S12 Fig.** Effect on starvation and desiccation in male *dilp* mutant flies. **A.** In 6-  
1402 7 days old male flies *dilp1-dilp2* mutants are least resistant to starvation  
1403 (p<0.001), followed by *dilp2* mutants (p<0.001), whereas *dilp1* mutants  
1404 perform as controls; n = 125-141 flies from three independent replicates.  
1405 However 6-7 d female flies perform as 3 d virgin females (see [34] and Table  
1406 1). **B.** In males double mutants are less (p<0.001), and the other two mutants  
1407 more resistant (p<0.001) to desiccation than controls, n = 134-135 flies from  
1408 three independent replicates. Data are presented in survival curves and the  
1409 error bars means S.E.M, as assessed by log-rank (Mantel–Cox) test].

1410

1411 **S13 Fig.** Targeted *dilp1*-RNAi in IPCs reduces survival in flies exposed to  
1412 starvation. **A.** The efficiency of *dilp2>dilp1*-RNAi on *dilp1* levels was monitored  
1413 by qPCR. A strong reduction in *dilp1* was noted, but no effect was seen on



1414 levels of *dilp2* or *dilp6*. Data are presented as means  $\pm$  S.E.M, n = 3 replicates  
1415 per genotype with 10 pupae in each replicate. (\*p < 0.05, compared with  
1416 control flies, unpaired Students' t-test). **B.** In newly eclosed female flies  
1417 *dilp2>dilp1*-RNAi resulted in reduced survival during starvation. n = 148-170  
1418 flies from three independent replicates. Data are presented in survival curves  
1419 and the error bars means S.E.M [\*\*\*p < 0.001, as assessed by log-rank  
1420 (Mantel–Cox) test]. **C.** In 6-7 d old males *dilp1* overexpression in fat body (*pp1*-  
1421 Gal4) has no effect on starvation response. n = 117-128 flies from three  
1422 independent replicates. **E.** c929-driven *dilp1* does not affect the response to  
1423 starvation, n = 132-135 flies per genotype from three independent replicates.

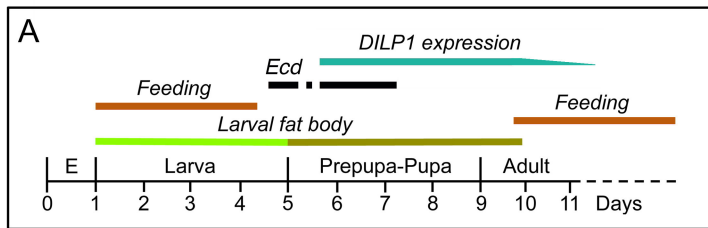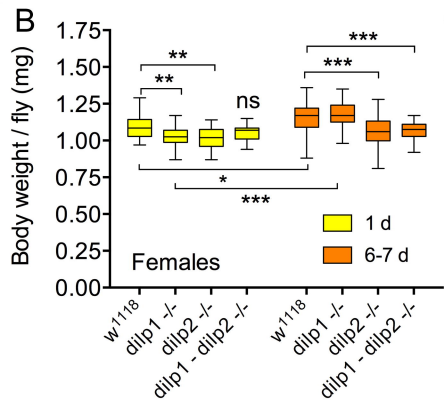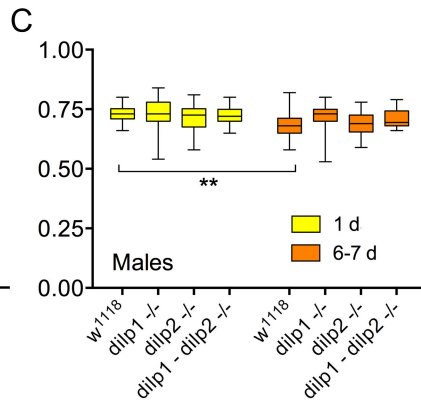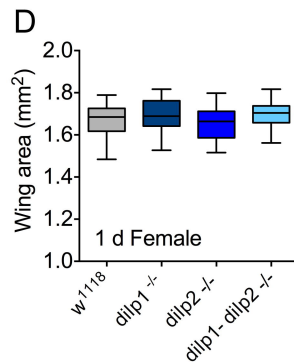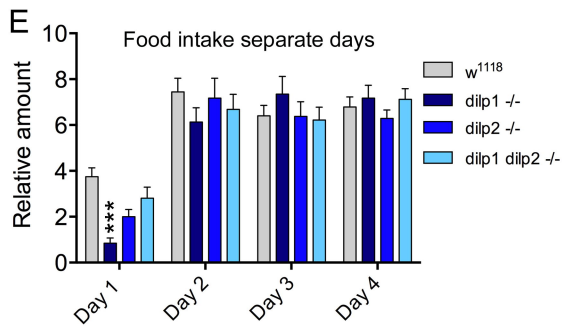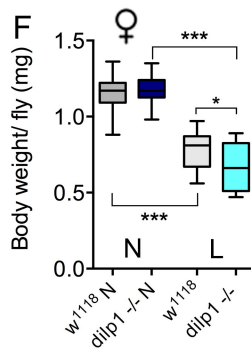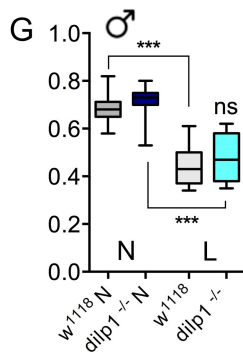

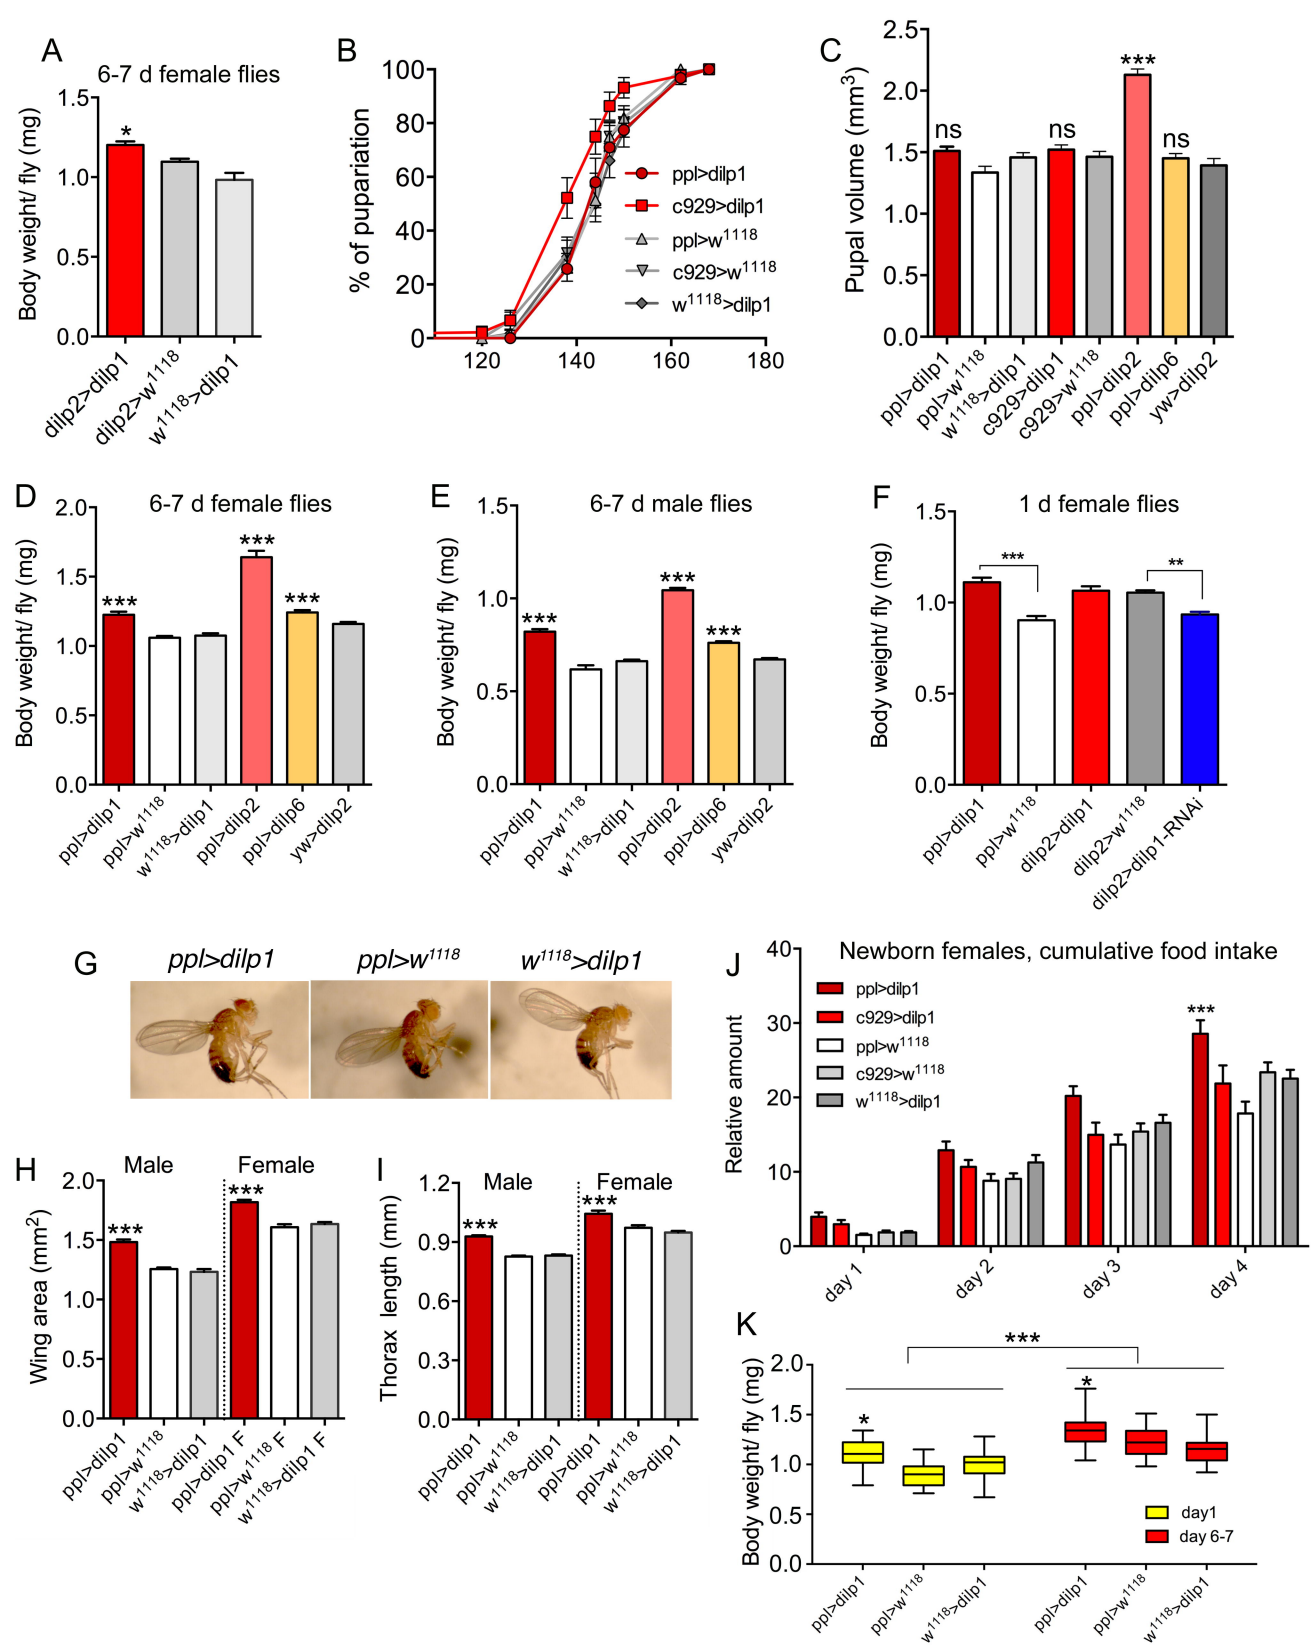

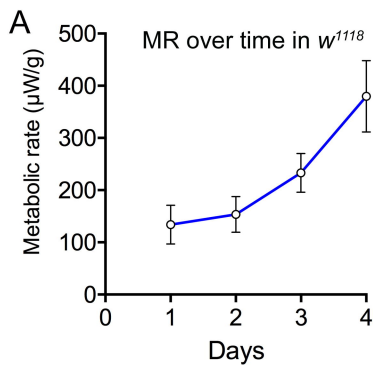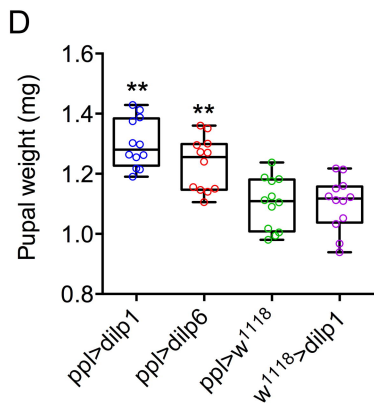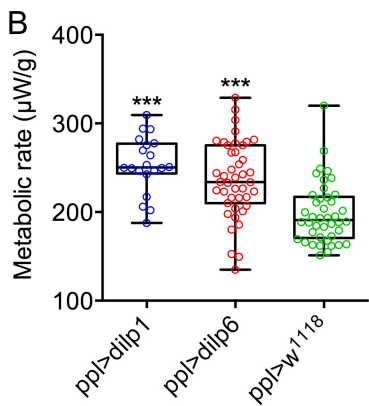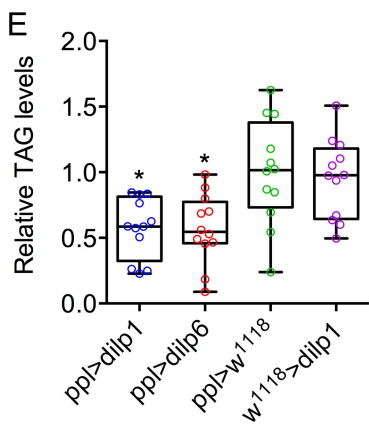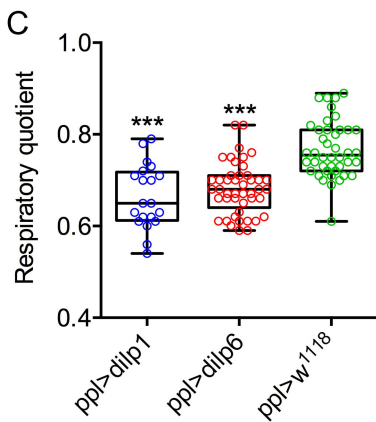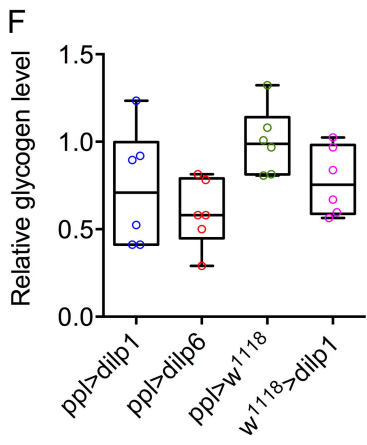

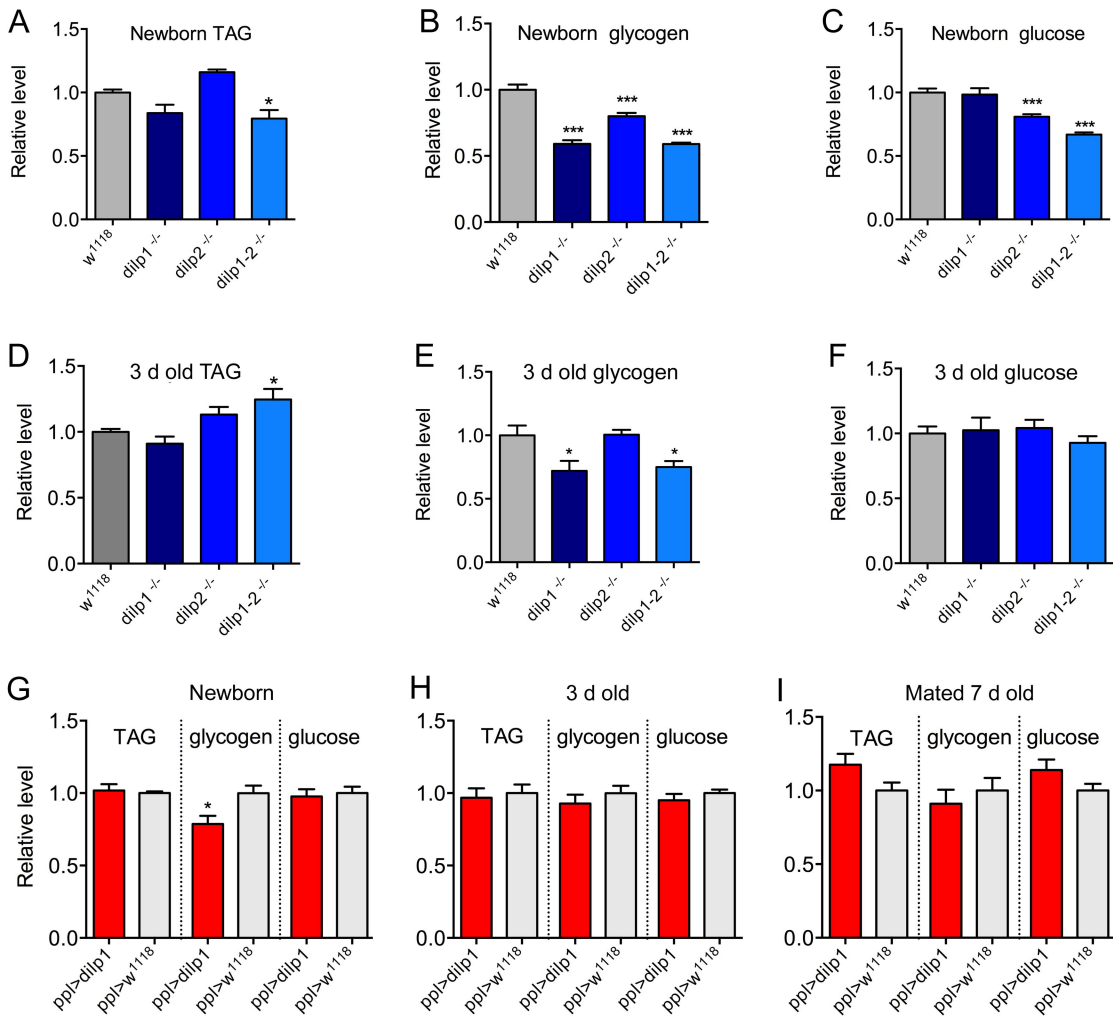

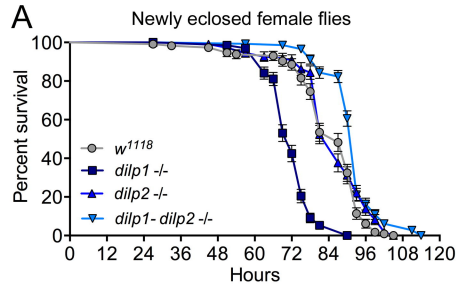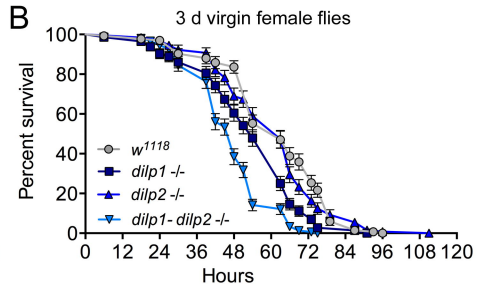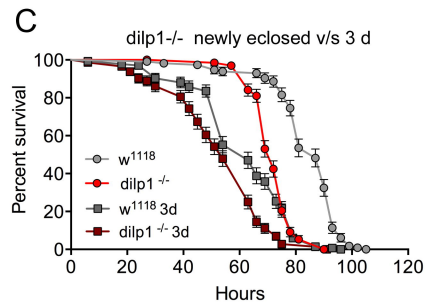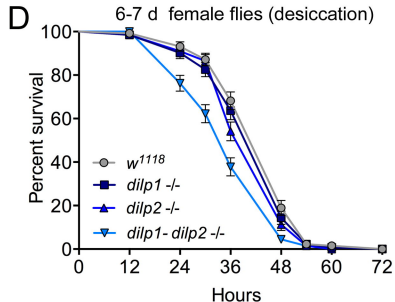

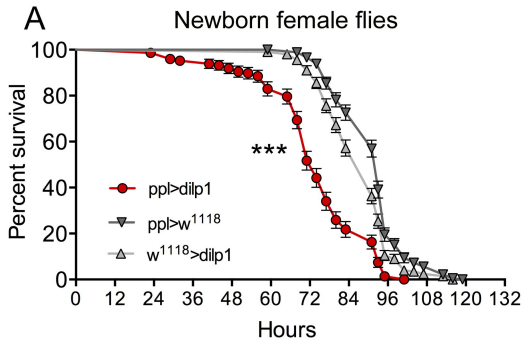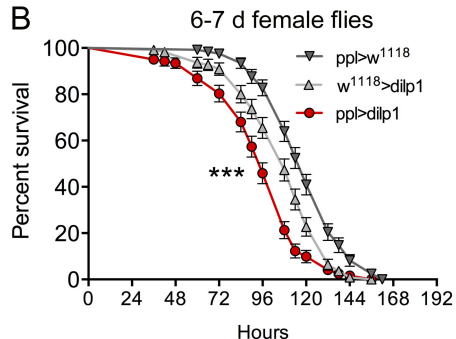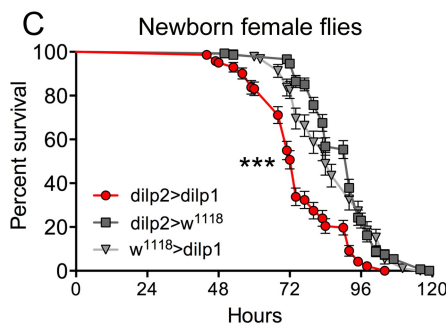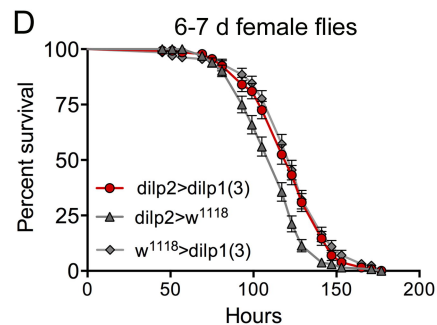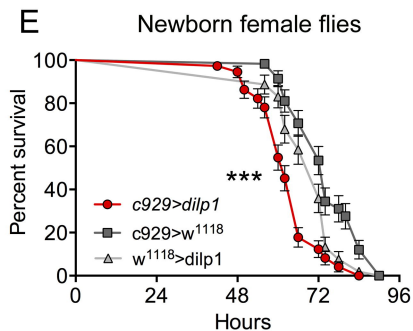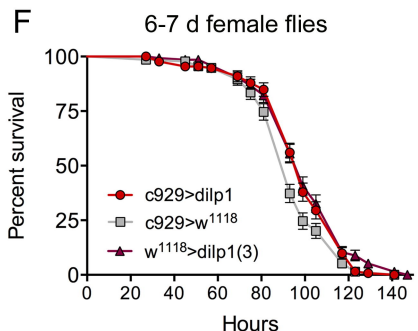

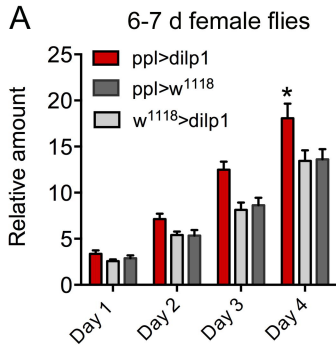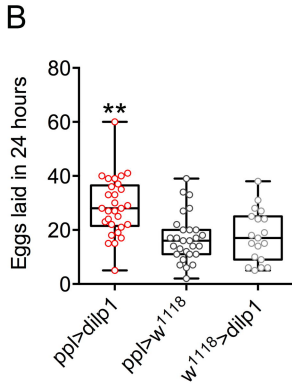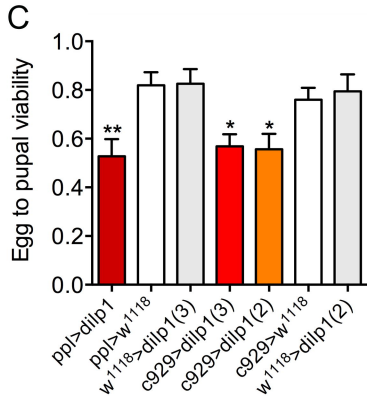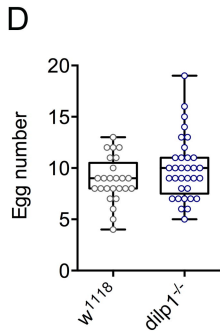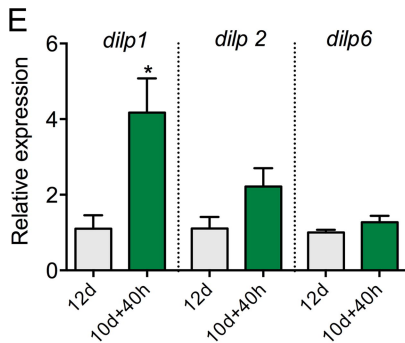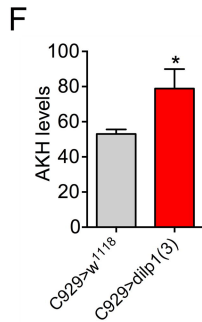

Source: http://biorxiv.org/content/10.1101/421669v2.full.pdf
